# Supplementary material for: PH domain-mediated autoinhibition and oncogenic activation of Akt
Source: eLife journal article supplement (doi:10.7554/elife.80148), 2022-08-15

Dephosphorylation by Alkaline PPase on either pT308 or pS473 of WT Akt

Time (min)    0    5    10    20    40    80

pS473

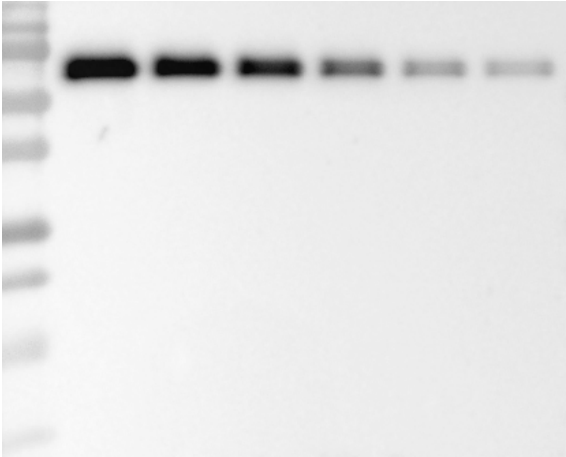

Time (min)    0    5    10    20    40    80

pT308

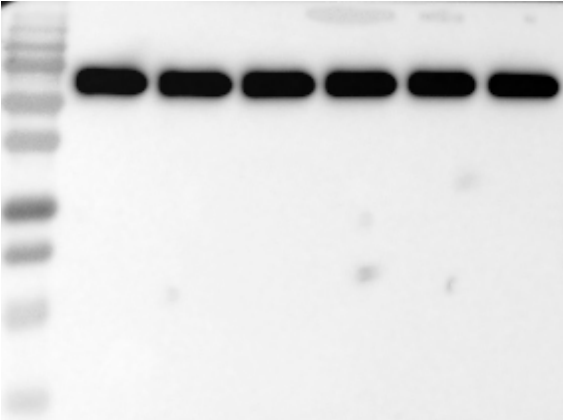

Time (min)    0    5    10    20    40    80

Total  
Akt

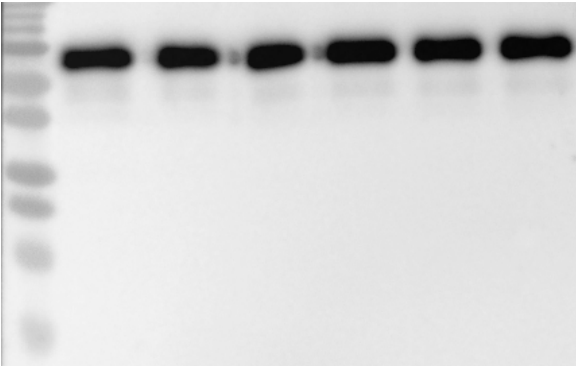

Dephosphorylation by Alkaline PPase on either pT308 or pS473 of R86A Akt

Time (min)    0    5    10    20    40    80

pS473

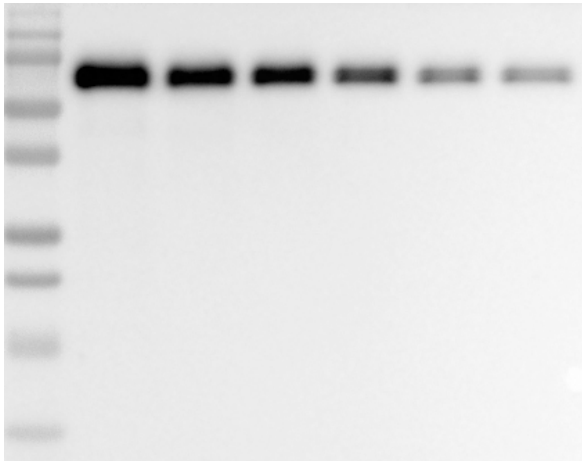

Time (min)    0    5    10    20    40    80

pT308

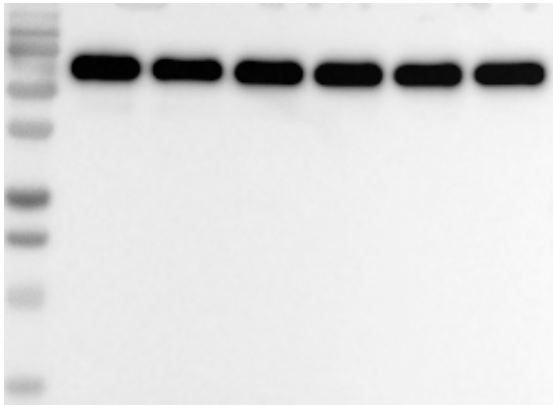

Time (min)    0    5    10    20    40    80

Total  
Akt

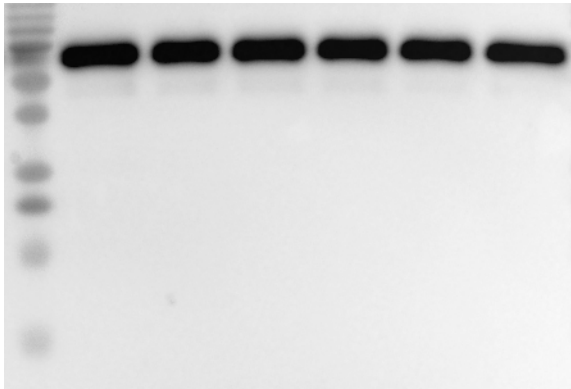

Dephosphorylation by Alkaline PPase on either pT308 or pS473 of E17K Akt

Time (min) 0 5 10 20 40 80

pS473

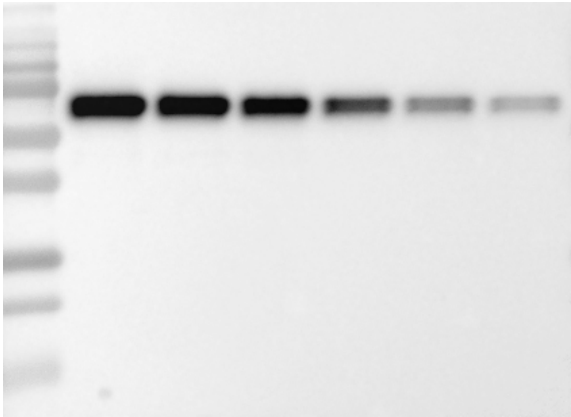

Time (min) 0 5 10 20 40 80

pT308

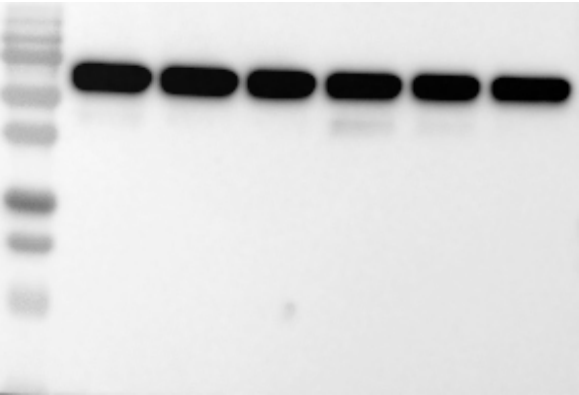

Time (min) 0 5 10 20 40 80

Total  
Akt

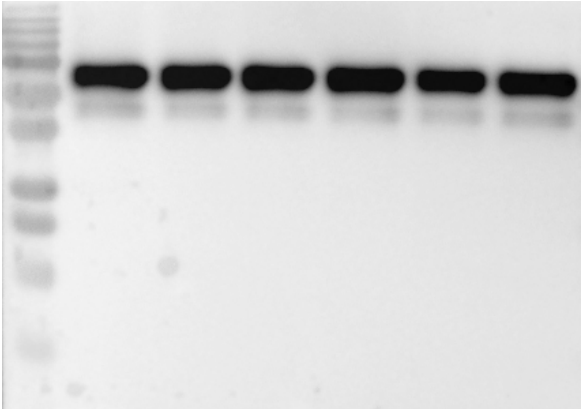

Dephosphorylation by Alkaline PPase on either pT308 or pS473 of **Y18A** Akt

Time (min)    0    5    10    20    40    80

pS473

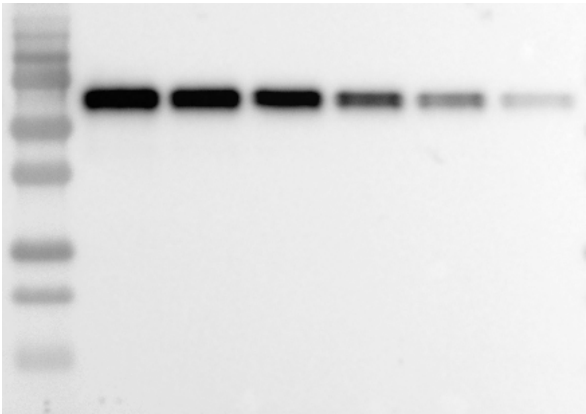

Time (min)    0    5    10    20    40    80

pT308

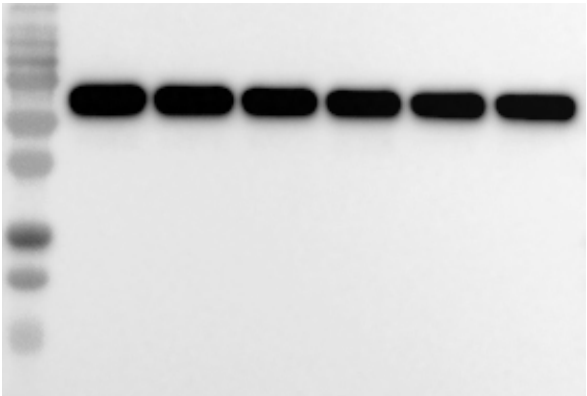

Time (min)    0    5    10    20    40    80

Total  
Akt

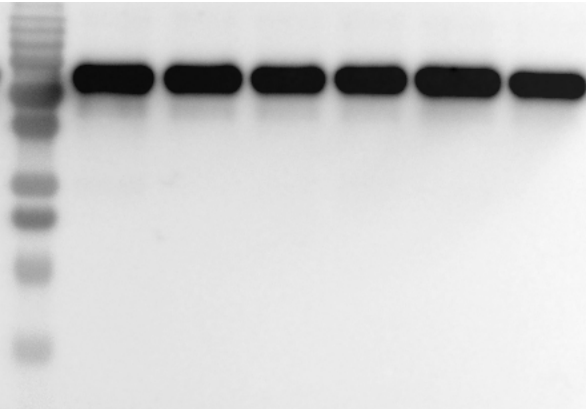

Supplement: supp [file elife-80148-supp-v1.zip]
