# Supplementary material for: PH domain-mediated autoinhibition and oncogenic activation of Akt
Source: eLife journal article supplement (doi:10.7554/elife.80148), 2022-08-15

Dephosphorylation by PP2A on pT308 of WT Akt

Time (min) 0 10 20 30 60 90

Run1

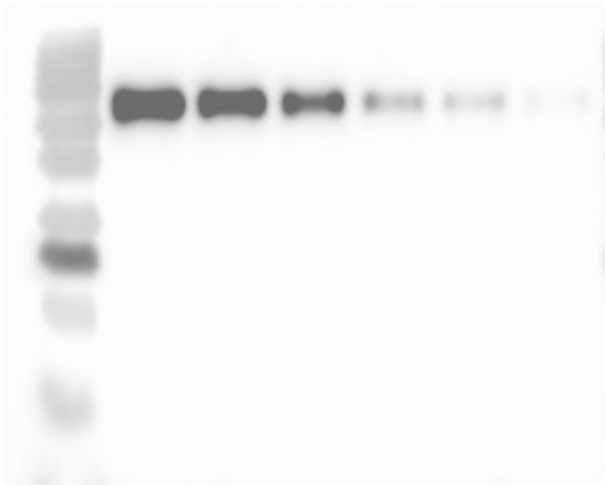

Time (min) 0 10 20 30 60 90

Run2

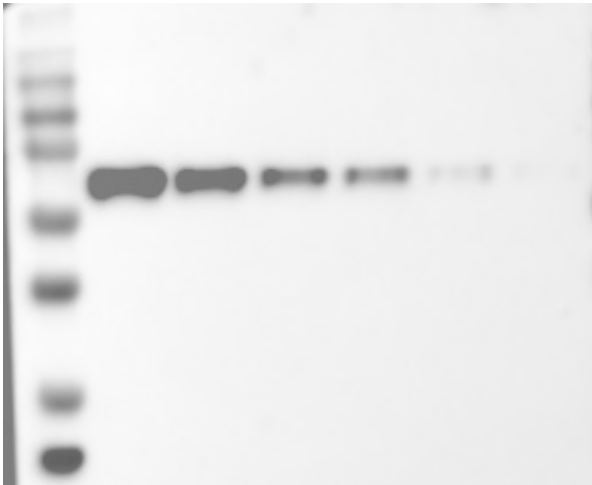

Time (min) 0 10 20 30 60 90

Run3

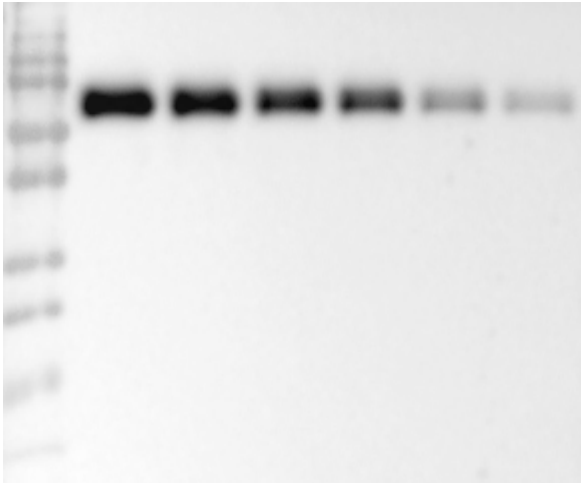

Time (min) 0 10 20 30 60 90

Run4

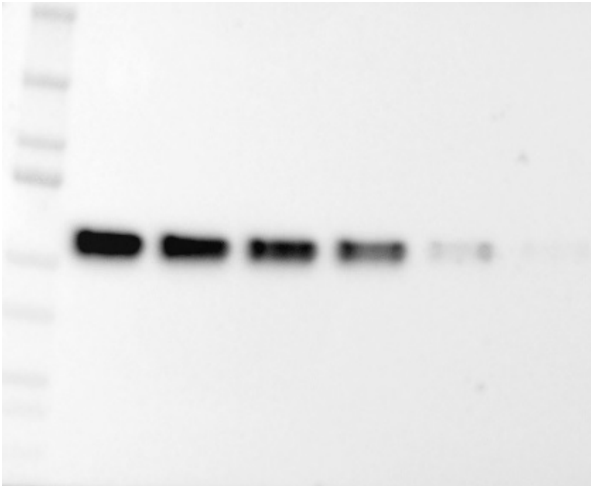

Time (min) 0 10 20 30 60 90

Total  
Akt

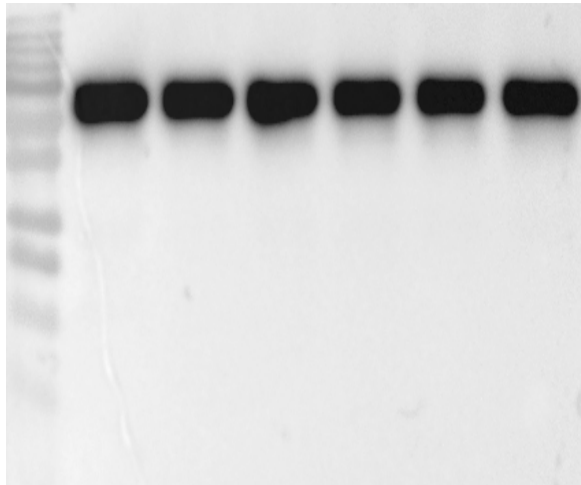

# Dephosphorylation by PP2A on pT308 of R86A Akt

Time (min) 0 10 20 30 60 90

Run1

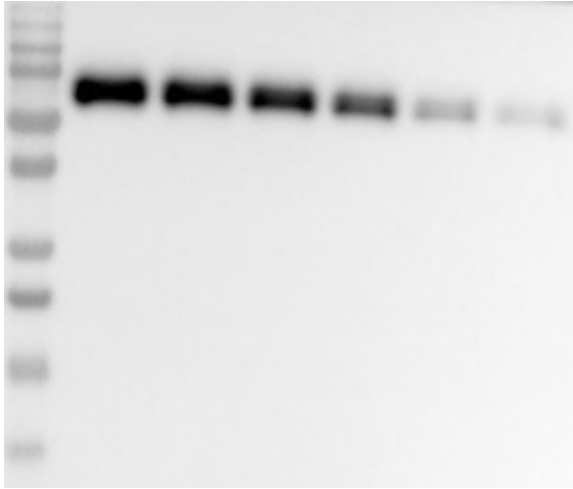

Time (min) 0 10 20 30 60 90

Run2

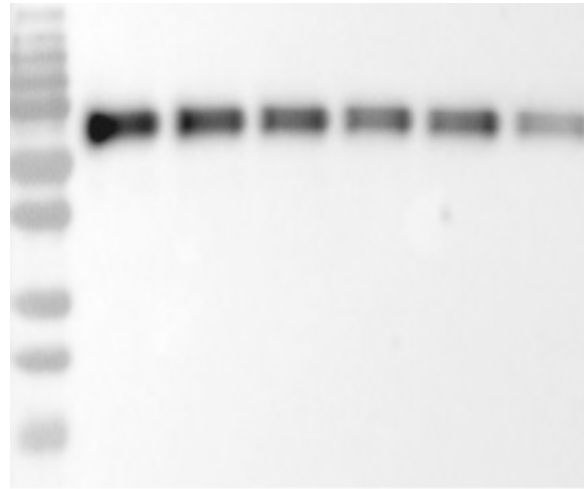

Time (min) 0 10 20 30 60 90

Run3

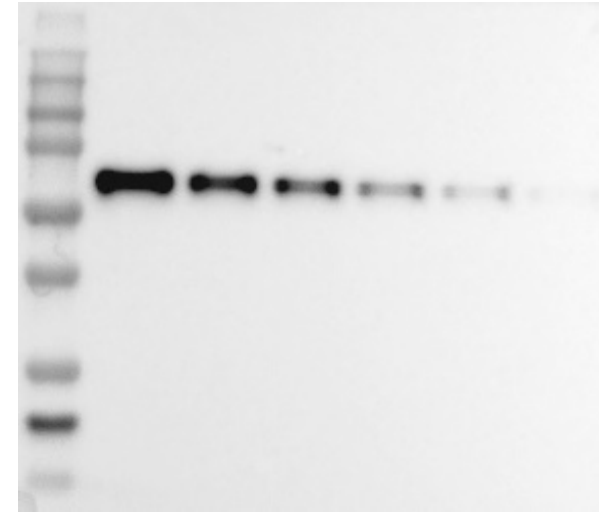

Time (min) 0 10 20 30 60 90

Total  
Akt

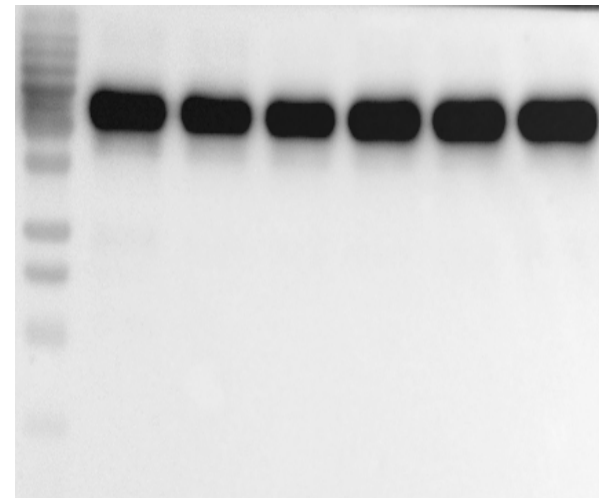

# Dephosphorylation by PP2A on pT308 of E17K Akt

Time (min) 0 10 20 30 60 90

Run1

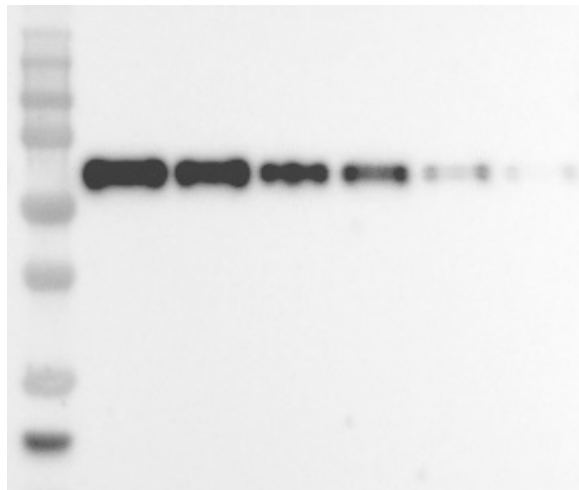

Time (min) 0 10 20 30 60 90

Run2

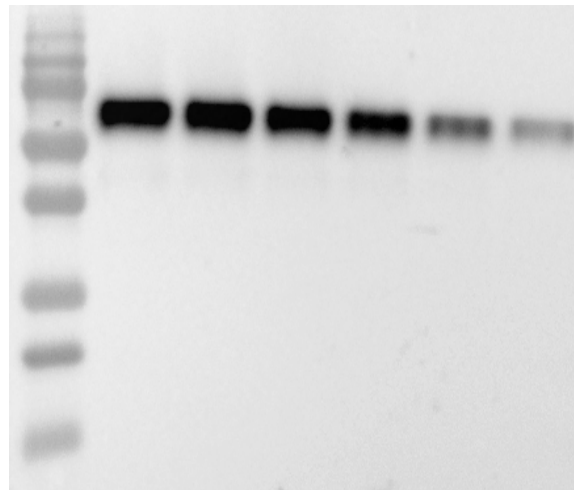

Time (min) 0 10 20 30 60 90

Run3

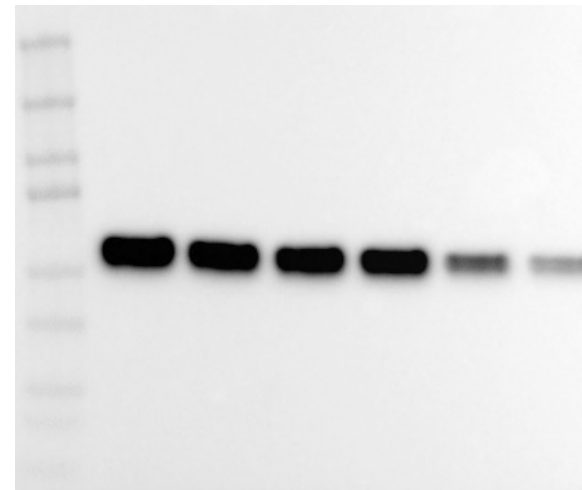

Time (min) 0 10 20 30 60 90

Run4

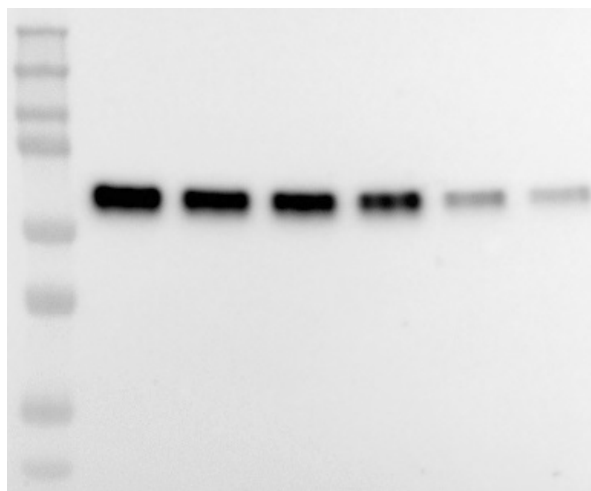

Time (min) 0 10 20 30 60 90

Run5

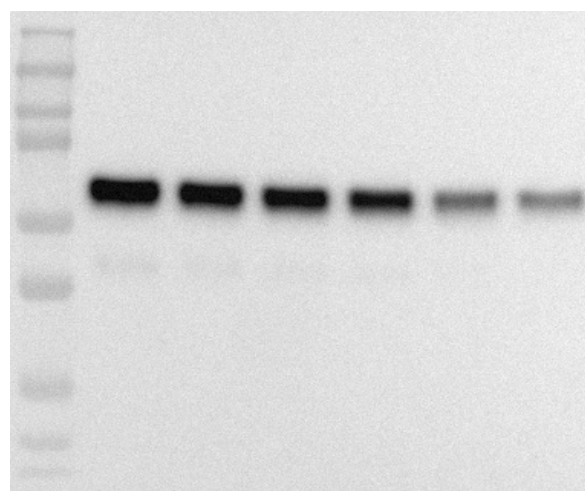

Time (min) 0 10 20 30 60 90

Total  
Akt

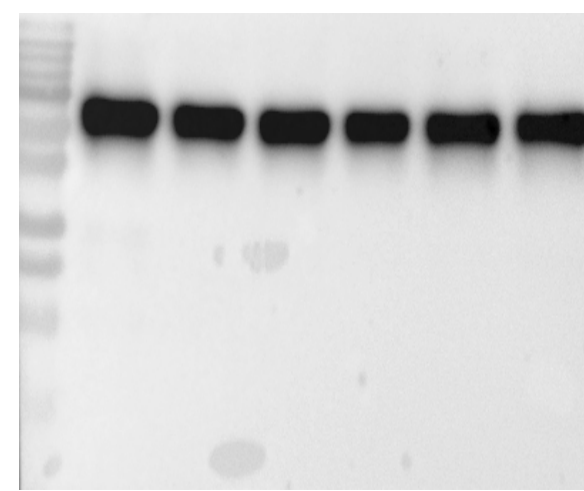

# Dephosphorylation by PP2A on pT308 of Y18A Akt

Time (min) 0 10 20 30 60 90

Run1

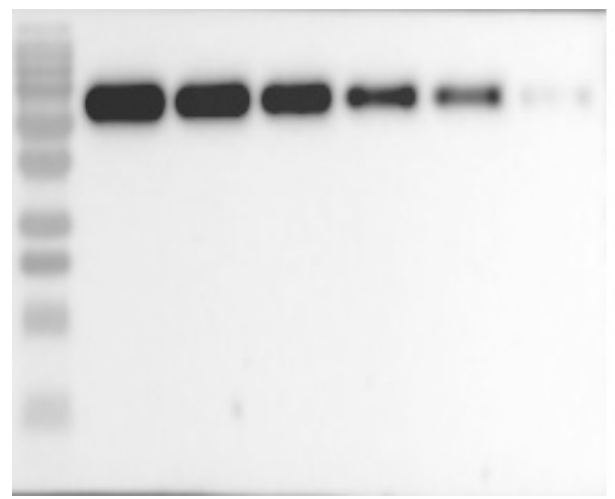

Time (min) 0 10 20 30 60 90

Run2

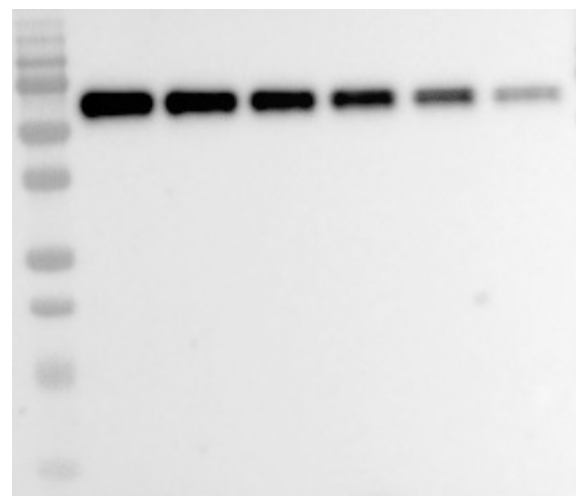

Time (min) 0 10 20 30 60 90

Run3

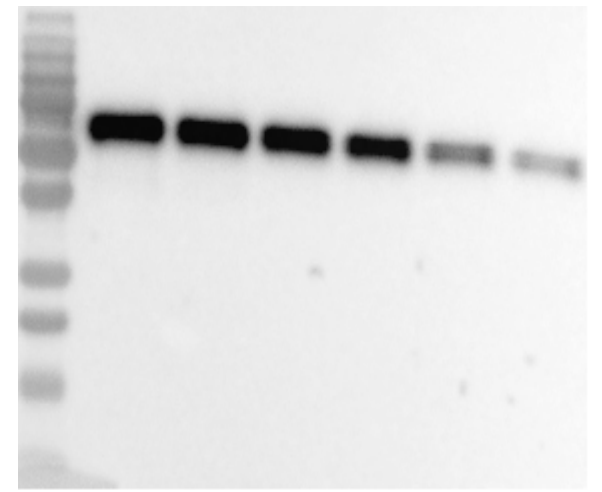

Time (min) 0 10 20 30 60 90

Total  
Akt

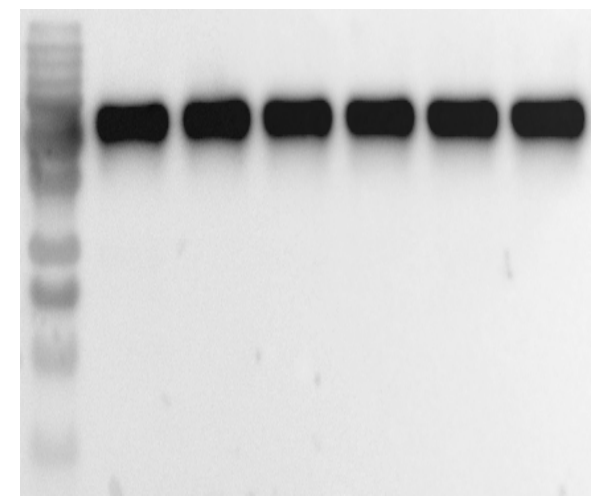

Supplement: supp [file elife-80148-supp-v1.zip]
