# Supplementary material for: PH domain-mediated autoinhibition and oncogenic activation of Akt
Source: eLife. 2022 Aug 15;11:e80148. doi: 10.7554/eLife.80148 (PMC9417420; doi:10.7554/eLife.80148)
Supplement: Figure 6—figure supplement 3—source data 1. [file elife-80148-fig6-figsupp3-data1.zip]

Archive with 4 entries (4 files):
- Anti-Akt.png
- Anti-pT308(CST #13038S).jpg
- Anti-pT308(CST #9275S).jpg
- Figure 6-figure supplement 3-source data 1_Western blots with labeling.pdf
