# Supplementary material for: PH domain-mediated autoinhibition and oncogenic activation of Akt
Source: eLife. 2022 Aug 15;11:e80148. doi: 10.7554/eLife.80148 (PMC9417420; doi:10.7554/eLife.80148)
Supplement: Figure 7—source data 1. [file elife-80148-fig7-data1.zip]

Archive with 14 entries (14 files):
- Akt_1.jpg
- Akt_2.jpg
- Figure 7-source data_Cell-based assays (Western blots with labeling).pdf
- Figure 7-source data_Cell-based_assays_(Western_blots)_Quantification.xlsx
- Foxo1_1.jpg
- Foxo1_2.jpg
- Foxo3a_1.jpg
- Foxo3a_2.jpg
- GAPDH_1.jpg
- GAPDH_2.png
- p-Foxo1_3a_1.jpg
- p-Foxo1_3a_2.jpg
- pT308(Akt)_1.jpg
- pT308(Akt)_2.jpg
