# Supplementary material for: PH domain-mediated autoinhibition and oncogenic activation of Akt
Source: eLife journal article supplement (doi:10.7554/elife.80148), 2022-08-15
Supplement: supp [file elife-80148-supp-v1.zip]

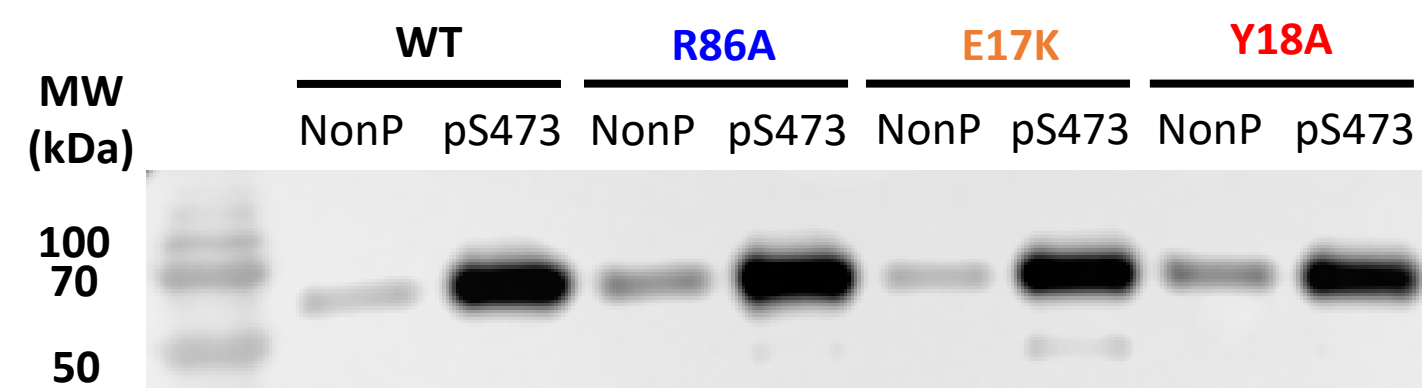

IB: Anti-pS473

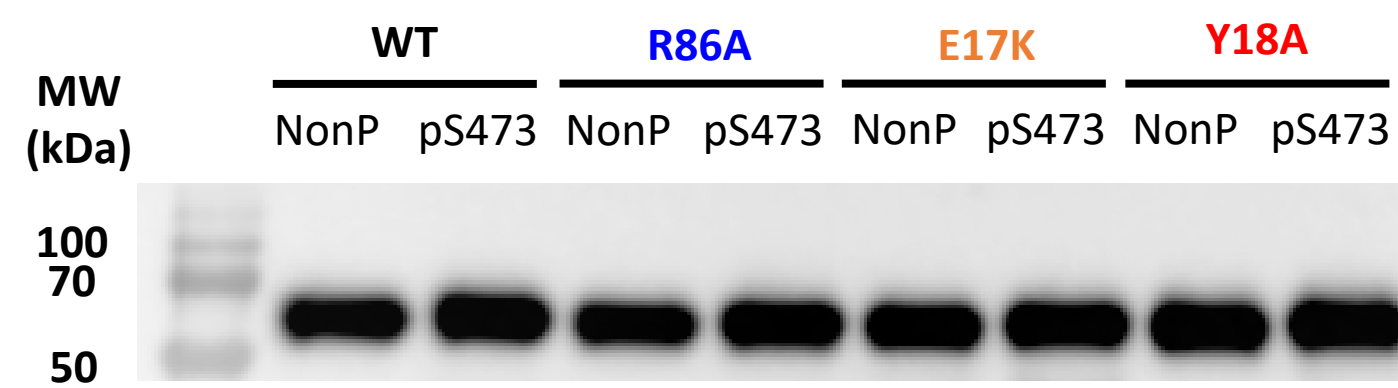

IB: Anti-pT308

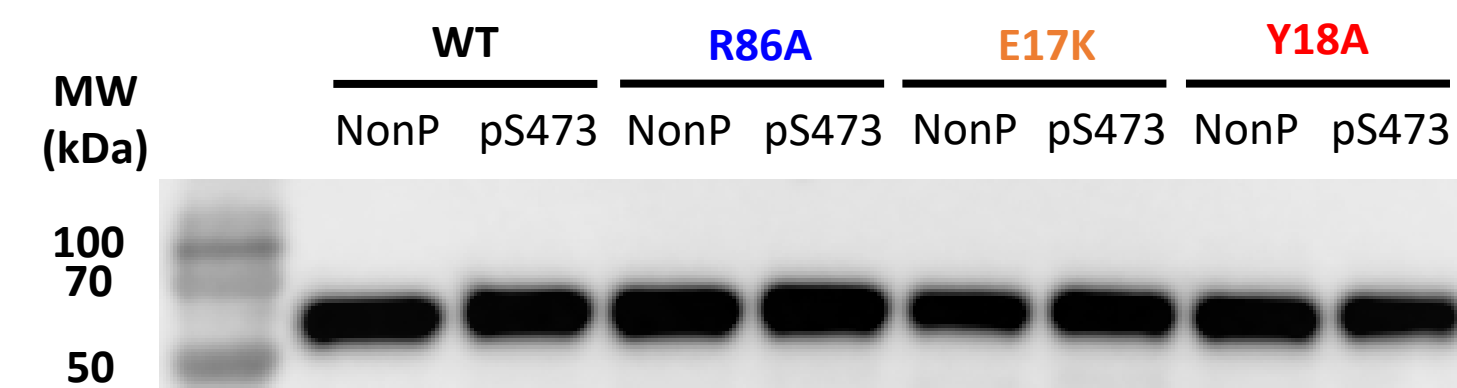

IB: Anti-Akt

- Western blots were obtained with razor blades to isolate particular regions based on their well-established distinct molecular weights. This is a common and accepted rigorous method done to: 1) ensure that the loading is in fact equal for these experiments in a given lane and 2) to preserve the precious antibody reagents. This is an accepted practice in the field for well-established antibodies like these since they are known to be quite specific. Even if they did light up other bands at different MWs it would not change the conclusions.
