# Supplementary material for: PH domain-mediated autoinhibition and oncogenic activation of Akt
Source: eLife journal article supplement (doi:10.7554/elife.80148), 2022-08-15
Supplement: supp [file elife-80148-supp-v1.zip]

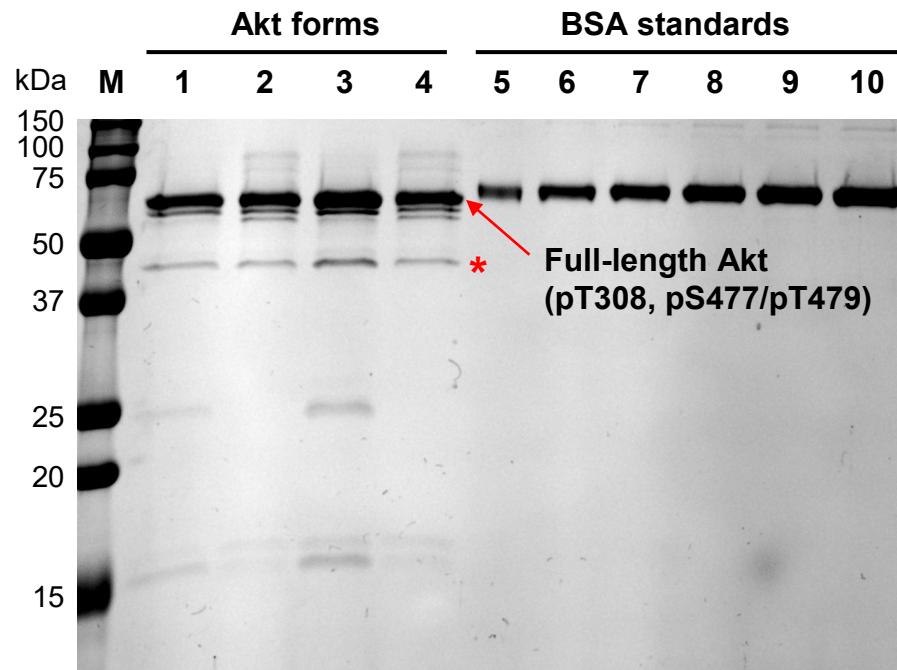

The purity and concentration of each Akt form determined using SDS-PAGE followed by Coomassie staining. lane 1: WT, lane 2: R86A, lane 3: K30A R48A, lane 4: R15A K20A R67A, lane 5–10: BSA standards 0.1, 0.2, 0.3, 0.4, 0.5, 0.6  $\mu\text{g}$ , M: protein markers (kDa). \* Mark indicates PreScission Protease added to cleave the N-terminal tags, which does not appear to alter the Akt catalytic activities.
