# Supplementary material for: PH domain-mediated autoinhibition and oncogenic activation of Akt
Source: eLife journal article supplement (doi:10.7554/elife.80148), 2022-08-15
Supplement: supp [file Figure 7-source data_Cell-based_assays_(Western_blots)_Quantification.xlsx]

## Sheet: Run1
Name	Volume	Centre X	Centre Y	Area	Akt	Subtracted	Normalized
1	33705499	511	575	1904	Non-Myr	33505954	1
2	32885084	569	576	1768	N	32690958
3	46027706	625	578	1768	WT	45815757	1.36739
4	43554718	681	580	1900	WT	43328825	1.29317
5	69181327	735	579	2496	Y18A	68856013	2.05504
6	62668594	790	579	2496	Y18A	62347465	1.86079
Copy of 1	199545	513	639	1904
Copy of 2	194126	571	640	1768
Copy of 3	211949	627	642	1768
Copy of 4	225893	683	644	1900
Copy of 5	325314	737	643	2496
Copy of 6	321129	792	643	2496

## Sheet: Run2
	Name	Volume	Centre X	Centre Y	Area				Normalized
1	3	20913946	285	991	1512		Non-Myr	20690552	1
2	4	13310377	343	994	1352		N	13115509
3	5	21517131	398	995	1300		WT	21304723	1.02968
4	6	25804856	452	996	1300		WT	25578900	1.23626
5	7	51845476	725	1004	1836		Y18A	51402419	2.48434
6	8	50350129	780	1004	1972		Y18A	49852520	2.40943
7	Copy of 3	223394	285	1028	1512
8	Copy of 4	194868	343	1031	1352
9	Copy of 5	212408	398	1032	1300
10	Copy of 6	225956	452	1033	1300
11	Copy of 7	443057	725	1041	1836
12	Copy of 8	497609	780	1041	1972
