# Supplementary material for: PH domain-mediated autoinhibition and oncogenic activation of Akt
Source: eLife journal article supplement (doi:10.7554/elife.80148), 2022-08-15
Supplement: supp [file Figure_2-source_data_Kinase_activity_assay_Akt-pS477-pT479_with_different_mutations_on_the_PH_domain.xlsx]

## Sheet: Sheet1
Kinase Assay with FL-PH(WT)-S122C pThr308-pSer477/pThr479
Kinase Assay with FL-PH(K30A R48A)-S122C pThr308-pSer477/pThr479
Kinase Assay with FL-PH(R15A K20A R67A)-S122C pThr308-pSer477/pThr479							[ATP]=250uM	[GSK3]=20uM
Vial number	Conc. of Akt(nM)	Counts (cpm)	Construct	Signal-BG	% of ATP	Consumed ATP	Rate (uM/min)	Conc.(uM)	V/E (/min)	% of GSK3
1	10	10325.9	WT	8794.44	0.00476565	1.19141	0.119141	0.01	11.9141	0.0595707
2	10	9780.21		8248.71	0.00446993	1.11748	0.111748	0.01	11.1748	0.0558741
3	10	10599.2		9067.67	0.00491372	1.22843	0.122843	0.01	12.2843	0.0614215
4	10	12333	2A	10801.5	0.00585328	1.46332	0.146332	0.0103213	14.1777	0.073166
5	10	13119.3		11587.8	0.00627937	1.56984	0.156984	0.0103213	15.2097	0.0784921
6	10	12514.6		10983.1	0.00595168	1.48792	0.148792	0.0103213	14.416	0.074396
7	10	9688.12	3A	8156.62	0.00442002	1.10501	0.110501	0.01	11.0501	0.0552503
8	10	9808.48		8276.98	0.00448525	1.12131	0.112131	0.01	11.2131	0.0560656
9	10	9742.73		8211.23	0.00444962	1.1124	0.11124	0.01	11.124	0.0556202
10	10	1335.03	no Akt
11	10	717.61
12	10	2541.87		1531.5
13	Reference (5 ul)	206939
14	Reference (5 ul)	207400
15	Reference (5 ul)	201277
16	Reference (5 ul)	204553
	Average Ref.	205042
	Reference (45 ul)	1.84538e+06

## Sheet: Sheet2
Kinase Assay with FL-PH(R86A)-S122C pThr308-pSer477/pThr479							[ATP]=250uM	[GSK3]=20uM
Vial number	Conc. of Akt(nM)	Counts (cpm)	Construct		% of ATP	Consumed ATP	Rate (uM/min)	Conc.(uM)	V/E (/min)	% of GSK3
1	250	14378.1	R86A	14190.7	0.0299259	7.48148	0.748148	0.25	2.99259	0.374074
2	250	15416.9		15229.5	0.0321166	8.02914	0.802914	0.25	3.21166	0.401457
3	50	3521.72		3334.34	0.00703156	1.75789	0.175789	0.05	3.51578	0.0878945
4	50	3686.05		3498.66	0.0073781	1.84453	0.184453	0.05	3.68905	0.0922263
5	10	901.33		713.945	0.00150559	0.376398	0.0376398	0.01	3.76398	0.0188199
6	10	831.37		643.985	0.00135806	0.339514	0.0339514	0.01	3.39514	0.0169757
(WT) 7	10	2524.84	WT	2337.45	0.0049293	1.23233	0.123233	0.01	12.3233	0.0616163
(WT) 8	10	2491.02		2303.64	0.00485798	1.2145	0.12145	0.01	12.145	0.0607248
9	0	204.14	187.385
10	0	170.63
11	Reference (5 ul)	53792
12	Reference (5 ul)	53401
13	Reference (5 ul)	52024.7
14	Reference (5 ul)	51536
	Average Ref.	52688.4
	Reference (45 ul)	474196
