# Supplementary material for: PH domain-mediated autoinhibition and oncogenic activation of Akt
Source: eLife journal article supplement (doi:10.7554/elife.80148), 2022-08-15
Supplement: supp [file Figure_2-source_data_Kinase_activity_assay_R86A_Akt_with_differentially_phosphorylated_C-tails.xlsx]

## Sheet: Sheet1
Kinase Assay with FL-Akt(R86A)-pT308-pS473(0828) FL-Akt(R86A)-pT308-pS477-pT479(0828)							[ATP]=250uM	[GSK3]=20uM
Akt	Vial number	Conc. of Akt(nM)	Counts (cpm)	Avg		% of ATP	Consumed ATP	Rate (uM/min)	Conc.(uM)	V/E (/min)	% of GSK3
R86A pS473	1	50	7779.3	6908.5	6355.7	0.00505999	1.265	0.1265	0.05	2.52999	0.0632499
	2	50	6037.7
	3	10	1891.3	1946.4	1393.6	0.00110949	0.277373	0.0277373	0.01	2.77373	0.0138687
	4	10	2001.5
R86A pS477 pT479	5	50	4868.2	4898.7	4345.9	0.00345992	0.86498	0.086498	0.05	1.72996	0.043249
	6	50	4929.2
	7	10	1381.23	1315.74	762.945	0.000607406	0.151852	0.0151852	0.01	1.51852	0.00759258
	8	10	1250.26
Ctrl	13	0	588.7	552.8
	14	0	516.9
	15	Reference (5 ul)	140394
	16	Reference (5 ul)	138974
	17	Reference (5 ul)	137817
	18	Reference (5 ul)	141069
		Average Ref.	139563
		Reference (45 ul)	1.25607e+06

## Sheet: Sheet2
Kinase assay with FL-Akt(R86A)-pT308-Non-P (0828)						[ATP]=250uM	[GSK3]=20uM
Vial number	Conc. of Akt(nM)	Counts (cpm)	Avg		% of ATP	Consumed ATP	Rate (uM/min)	Conc.(uM)	V/E (/min)	% of GSK3
3	10	803.16	803.16	284.09	0.00019988	0.0499699	0.00499699	0.01	0.499699	0.0024985
4	10	757.72	757.72	238.65	0.000167909	0.0419773	0.00419773	0.01	0.419773	0.00209886
13	0	519.07	519.07
14
15	Reference (5 ul)	158506
16	Reference (5 ul)	158488
17	Reference (5 ul)	157117
18	Reference (5 ul)	157580
	Average Ref.	157923
	Reference (45 ul)	1.4213e+06

## Sheet: Sheet3
Kinase Assay with FL-Akt(WT)-pT308-pS473 (210310)
								[GSK3]=20uM
Akt	Vial number	Conc. of ATP(uM)	Conc. of Akt(nM)	Counts (cpm)	Avg	Subtracted	% of ATP	Consumed ATP	Rate (uM/min)	Conc.(uM)	V/E (/min)	% of GSK3
WT	5	250	10	1265	1265	1143	0.00394581	0.986454	0.0986454	0.01	9.86454	0.0493227
WT	6	250	10	1097	1097	975	0.00336585	0.841463	0.0841463	0.01	8.41463	0.0420732
No Sub	21	2500		130	122
No Sub	21	2500		117
No Sub	22	2500		112
No Sub	24	2500		129
	25		Reference (5 ul)	32848
	26		Reference (5 ul)	31551
	27		Reference (5 ul)	31830
	28		Reference (5 ul)	32515
			Average Ref.	32186
			Reference (45 ul)	289674
