# Supplementary material for: PH domain-mediated autoinhibition and oncogenic activation of Akt
Source: eLife journal article supplement (doi:10.7554/elife.80148), 2022-08-15
Supplement: supp [file Figure_3_NMR_CSP_sourcedata.xlsx]

## Sheet: PHD_WT_R86A
PH Domain isolated - WT vs R86A
WT					R86A
1H CS	15N CS	Assign F1	Assign F2	Height	1H CS	15N CS	Assign F1	Assign F2	Height		Res. Number	Intensity ratio	Diff 1H	Diff 15N	CCSP	SDM
											1	0	0	0	0	0.422736
					8.28047	122.44	2SerH	2SerN	52466.5		2	0	0	0	0	0.422736
8.72521	123.918	3AspH	3AspN	14351.3	8.44775	122.851	3AspH	3AspN	24944.8		3	1.73816	-0.27746	-1.06635	0.298018	0.422736
7.51128	121.009	4ValH	4ValN	26360.3	8.19829	123.292	4ValH	4ValN	111217		4	4.21911	0.68701	2.28372	0.725426	0.422736
8.55398	122.657	5AlaH	5AlaN	12776.9	8.08751	129.563	5AlaH	5AlaN	42430.3		5	3.32086	-0.46647	6.90637	0.844893	0.422736
8.34025	120.821	6IleH	6IleN	33465.1	8.48313	121.38	6IleH	6IleN	31673.6		6	0.946467	0.14288	0.55838	0.153813	0.422736
9.24395	129.33	7ValH	7ValN	17057.2	9.33783	130.165	7ValH	7ValN	14414.9		7	0.845092	0.09388	0.8359	0.126819	0.422736
7.95274	121.621	8LysH	8LysN	31863.8	7.51509	120.585	8LysH	8LysN	22785.3		8	0.715084	-0.43765	-1.03557	0.450216	0.422736
											9	0	0	0	0	0.422736
8.36448	107.783	10GlyH	10GlyN	16508.7	8.34353	108.182	10GlyH	10GlyN	23714.6		10	1.43649	-0.02095	0.39993	0.045858	0.422736
8.63076	119.22	11TrpH	11TrpN	36156.5	8.68542	119.336	11TrpH	11TrpN	28796.7		11	0.796446	0.05466	0.11543	0.0559137	0.422736
9.49506	122.162	12LeuH	12LeuN	17594.5	9.55352	123.395	12LeuH	12LeuN	18386.4		12	1.04501	0.05846	1.23315	0.138703	0.422736
8.21127	118.696	13HisH	13HisN	17017.8	8.00925	119.525	13HisH	13HisN	27195.6		13	1.59807	-0.20202	0.82917	0.219009	0.422736
8.84989	119.676	14LysH	14LysN	17433.5	9.45701	127.468	14LysH	14LysN	9951.98		14	0.570854	0.60712	7.79173	1.00012	0.422736
7.93189	131.937	15ArgH	15ArgN	17043.3	8.19796	133.461	15ArgH	15ArgN	13385.6		15	0.785388	0.26607	1.52401	0.308152	0.422736
8.35542	115.672	16GlyH	16GlyN	18648.3	8.46769	116.053	16GlyH	16GlyN	18008.5		16	0.965691	0.11227	0.38067	0.118795	0.422736
					8.26751	122.643	17GluH	17GluN	32860.7		17	0	0	0	0	0.422736
					8.08769	118.246	18TyrH	18TyrN	12189.7		18	0	0	0	0	0.422736
8.21741	120.413	19IleH	19IleN	17588.5	7.76385	121.073	19IleH	19IleN	36408.8		19	2.07003	-0.45356	0.65983	0.458526	0.422736
8.58526	119.336	20LysH	20LysN	27310.5							20	0	0	0	0	0.422736
7.52652	114.265	21ThrH	21ThrN	39778.4	7.5732	115.309	21ThrH	21ThrN	50585.9		21	1.27169	0.04668	1.04469	0.116334	0.422736
8.6118	124.102	22TrpH	22TrpN	42632.9	8.63016	124.812	22TrpH	22TrpN	28910		22	0.678115	0.01836	0.71007	0.074718	0.422736
8.79046	122.37	23ArgH	23ArgN	16107.3	8.83943	123.02	23ArgH	23ArgN	17529.3		23	1.08828	0.04897	0.64915	0.0823545	0.422736
											24	0	0	0	0	0.422736
9.56288	126.57	25ArgH	25ArgN	15346.2	9.68509	127.487	25ArgH	25ArgN	14638.7		25	0.953897	0.12221	0.91731	0.153915	0.422736
8.66024	126.991	26TyrH	26TyrN	17200.7	8.8321	128.13	26TyrH	26TyrN	16294		26	0.947287	0.17186	1.13848	0.207415	0.422736
8.44973	128.638	27PheH	27PheN	14106.6	8.53123	129.412	27PheH	27PheN	19993.3		27	1.4173	0.0815	0.77446	0.113501	0.422736
9.14612	117.638	28LeuH	28LeuN	9964.58	9.11236	117.891	28LeuH	28LeuN	18648.6		28	1.87149	-0.03376	0.25274	0.0424773	0.422736
9.03454	123.878	29LeuH	29LeuN	15691.2	9.23593	124.89	29LeuH	29LeuN	16470.5		29	1.04966	0.20139	1.01189	0.226298	0.422736
9.28477	125.934	30LysH	30LysN	17230.7	9.3495	126.686	30LysH	30LysN	14573.5		30	0.845787	0.06473	0.75257	0.100411	0.422736
					8.6934	117.883	31AsnH	31AsnN	21737.5		31	0	0	0	0	0.422736
7.34104	116.618	32AspH	32AspN	26746	7.4183	117.149	32AspH	32AspN	31893.5		32	1.19246	0.07726	0.53154	0.0943854	0.422736
8.13822	108.132	33GlyH	33GlyN	21977.3	8.18561	108.315	33GlyH	33GlyN	30927.8		33	1.40726	0.04739	0.18337	0.0509474	0.422736
7.82307	121.867	34ThrH	34ThrN	14603.4	8.02751	116.88	34ThrH	34ThrN	31069.1		34	2.12753	0.20444	-4.98754	0.548271	0.422736
8.01923	128.725	35PheH	35PheN	30221	8.62817	130.243	35PheH	35PheN	16083.4		35	0.532193	0.60894	1.51819	0.628322	0.422736
					8.62831	122.408	36IleH	36IleN	17840.4		36	0	0	0	0	0.422736
8.08232	111.477	37GlyH	37GlyN	13978.3	7.95312	111.459	37GlyH	37GlyN	17737.4		37	1.26892	-0.1292	-0.01752	0.129212	0.422736
8.71028	121.133	38TyrH	38TyrN	16037.2	8.72732	121.693	38TyrH	38TyrN	11160.7		38	0.695926	0.01704	0.55999	0.0596065	0.422736
8.94757	121.362	39LysH	39LysN	27737.4	8.9382	121.874	39LysH	39LysN	12291.6		39	0.443142	-0.00937	0.51169	0.0530268	0.422736
8.36314	122.43	40GluH	40GluN	22227.9							40	0	0	0	0	0.422736
8.12764	122.75	41ArgH	41ArgN	59749.8							41	0	0	0	0	0.422736
											42	0	0	0	0	0.422736
8.2649	123.066	43GlnH	43GlnN	31030							43	0	0	0	0	0.422736
8.67002	117.562	44AspH	44AspN	21818.8							44	0	0	0	0	0.422736
											45	0	0	0	0	0.422736
											46	0	0	0	0	0.422736
											47	0	0	0	0	0.422736
					8.11274	121.332	48ArgH	48ArgN	82342.9		48	0	0	0	0	0.422736
7.60857	127.674	49GluH	49GluN	54945.6							49	0	0	0	0	0.422736
					8.46522	127.417	50AlaH	50AlaN	39384.7		50	0	0	0	0	0.422736
											51	0	0	0	0	0.422736
8.01942	121.924	52LeuH	52LeuN	47143.4							52	0	0	0	0	0.422736
											53	0	0	0	0	0.422736
8.62627	121.096	54AsnH	54AsnN	10433.7							54	0	0	0	0	0.422736
8.89615	121.782	55PheH	55PheN	12754	7.97817	120.019	55PheH	55PheN	42944.8		55	3.36716	-0.91798	-1.7634	0.935435	0.422736
8.53162	113.413	56SerH	56SerN	8655.44	8.93738	116.459	56SerH	56SerN	5058.29		56	0.584406	0.40576	3.04586	0.51104	0.422736
8.90851	119.179	57ValH	57ValN	18940.9	9.03638	119.387	57ValH	57ValN	21357.6		57	1.12759	0.12787	0.20793	0.129617	0.422736
8.04312	124.268	58AlaH	58AlaN	17996.4	7.7263	123.524	58AlaH	58AlaN	46754.4		58	2.59799	-0.31682	-0.74446	0.325793	0.422736
											59	0	0	0	0	0.422736
					7.84919	117.804	60CysH	60CysN	27423.3		60	0	0	0	0	0.422736
7.48449	115.138	61GlnH	61GlnN	14153.4							61	0	0	0	0	0.422736
8.58378	121.338	62LeuH	62LeuN	20485.9	8.74996	126.328	62LeuH	62LeuN	30556.2		62	1.49157	0.16618	4.99003	0.535425	0.422736
9.20202	126.288	63MetH	63MetN	22344.1	9.02553	122.693	63MetH	63MetN	25854.8		63	1.15712	-0.17649	-3.59528	0.406978	0.422736
8.78413	124.226	64LysH	64LysN	19209.3	8.81064	124.63	64LysH	64LysN	17832.8		64	0.928342	0.02651	0.40388	0.0489885	0.422736
8.00814	116.517	65ThrH	65ThrN	26699.7	8.07126	116.849	65ThrH	65ThrN	30396.6		65	1.13846	0.06312	0.33187	0.0716241	0.422736
8.27758	120.092	66GluH	66GluN	27586.2	8.31375	120.287	66GluH	66GluN	18490.3		66	0.670274	0.03617	0.195	0.0412781	0.422736
7.62678	118.037	67ArgH	67ArgN	22209.7	7.6771	118.42	67ArgH	67ArgN	28347		67	1.27633	0.05032	0.38353	0.0637376	0.422736
											68	0	0	0	0	0.422736
7.20838	119.678	69ArgH	69ArgN	11570.2	7.28025	120.112	69ArgH	69ArgN	23624		69	2.0418	0.07187	0.43437	0.0844292	0.422736
											70	0	0	0	0	0.422736
8.78211	113.421	71AsnH	71AsnN	28271.9	8.77745	113.827	71AsnH	71AsnN	14425.1		71	0.510227	-0.00466	0.40641	0.0417149	0.422736
					7.55426	116.867	72ThrH	72ThrN	32197		72	0	0	0	0	0.422736
9.46436	123.724	73PheH	73PheN	10564.7	9.53145	123.977	73PheH	73PheN	17470.1		73	1.65363	0.06709	0.25238	0.0718593	0.422736
9.18578	122.645	74IleH	74IleN	13348.8	9.16398	123.399	74IleH	74IleN	17341.6		74	1.29911	-0.0218	0.75399	0.079937	0.422736
9.1444	124.225	75IleH	75IleN	10142.2	9.15551	124.374	75IleH	75IleN	19692.8		75	1.94167	0.01111	0.14943	0.0188612	0.422736
					8.69676	127.511	76ArgH	76ArgN	21489.6		76	0	0	0	0	0.422736
					8.95696	123.765	77CysH	77CysN	7013.79		77	0	0	0	0	0.422736
											78	0	0	0	0	0.422736
7.93884	121.013	79GlnH	79GlnN	67823							79	0	0	0	0	0.422736
7.84622	119.37	80TrpH	80TrpN	21574.8							80	0	0	0	0	0.422736
7.93155	119.142	81ThrH	81ThrN	25940.6	8.23426	113.07	81ThrH	81ThrN	20027.6		81	0.772056	0.30271	-6.07192	0.689355	0.422736
8.48747	110.022	82ThrH	82ThrN	20131.3	8.15045	120.248	82ThrH	82ThrN	34541.7		82	1.71582	-0.33702	10.2258	1.09613	0.422736
7.98318	118.624	83ValH	83ValN	23562.2	8.49305	127.021	83ValH	83ValN	22769.5		83	0.966357	0.50987	8.39744	0.996808	0.422736
7.72813	121.071	84IleH	84IleN	32795.5							84	0	0	0	0	0.422736
7.77826	120.673	85GluH	85GluN	28138.6							85	0	0	0	0	0.422736
7.59642	120.41	86ArgH	86ArgN	18292.7	8.76995	129.044	86AlaH	86AlaN	16008.4		86	0.875125	1.17353	8.63358	1.4672	0.422736
7.79859	123.485	87ThrH	87ThrN	18579.1	8.06109	118.919	87ThrH	87ThrN	21764.2		87	1.17143	0.2625	-4.56574	0.534591	0.422736
8.51467	123.287	88PheH	88PheN	21722.3	8.8407	124.259	88PheH	88PheN	17271.7		88	0.795114	0.32603	0.97185	0.340767	0.422736
9.28761	118.156	89HisH	89HisN	14059.9	9.35055	118.701	89HisH	89HisN	16208.5		89	1.15282	0.06294	0.54488	0.0839662	0.422736
6.97912	117.071	90ValH	90ValN	29878.5	7.02587	117.07	90ValH	90ValN	15782.9		90	0.528236	0.04675	-0.00083	0.0467501	0.422736
					8.54802	116.563	91GluH	91GluN	28632		91	0	0	0	0	0.422736
					7.08986	105.236	92ThrH	92ThrN	47252.1		92	0	0	0	0	0.422736
											93	0	0	0	0	0.422736
					9.05436	121.544	94GluH	94GluN	29137.4		94	0	0	0	0	0.422736
					7.80481	121.243	95GluH	95GluN	29089.1		95	0	0	0	0	0.422736
					7.56664	120.711	96ArgH	96ArgN	33784.7		96	0	0	0	0	0.422736
											97	0	0	0	0	0.422736
					7.9192	119.783	98GluH	98GluN	37116.7		98	0	7.9192	119.783	14.5598	0.422736
7.9119	119.517	99TrpH	99TrpN	46093.7	7.8695	119.48	99TrpH	99TrpN	25806.8		99	0.559877	-0.0424	-0.03703	0.0425679	0.422736
7.59644	117.072	100ThrH	100ThrN	35746	8.523	110.258	100ThrH	100ThrN	27829.7		100	0.77854	0.92656	-6.8133	1.15822	0.422736
8.14875	118.935	101ThrH	101ThrN	19607.4	8.22447	119.295	101ThrH	101ThrN	36449.5		101	1.85897	0.07572	0.35979	0.0841445	0.422736
7.39475	126.027	102AlaH	102AlaN	20960.2	7.41016	126.598	102AlaH	102AlaN	37048.1		102	1.76755	0.01541	0.57164	0.0603093	0.422736
8.16536	117.351	103IleH	103IleN	21893	8.14382	117.673	103IleH	103IleN	27173.5		103	1.2412	-0.02154	0.32233	0.0393054	0.422736
7.8678	118.188	104GlnH	104GlnN	20712.4	7.90865	118.724	104GlnH	104GlnN	32617.2		104	1.57477	0.04085	0.53616	0.0682608	0.422736
					8.20547	115.921	105ThrH	105ThrN	37744		105	0	0	0	0	0.422736
7.36032	120.025	106ValH	106ValN	14044.7	7.82894	123.978	106ValH	106ValN	36699.5		106	2.61305	0.46862	3.95344	0.618236	0.422736
7.08209	117.006	107AlaH	107AlaN	30605.6	8.486	123.92	107AlaH	107AlaN	41829.1		107	1.36671	1.40391	6.91375	1.57107	0.422736
8.49678	116.413	108AspH	108AspN	27811.6	8.89628	119.962	108AspH	108AspN	30737.5		108	1.1052	0.3995	3.54869	0.539092	0.422736
7.86069	108.589	109GlyH	109GlyN	18395.2	7.86682	108.783	109GlyH	109GlyN	31879.8		109	1.73305	0.00613	0.19344	0.0206612	0.422736
					7.47041	121.629	110LeuH	110LeuN	41713.1		110	0	0	0	0	0.422736
					7.54617	121.516	111LysH	111LysN	46851		111	0	0	0	0	0.422736
											112	0	0	0	0	0.422736
											113	0	0	0	0	0.422736
											114	0	0	0	0	0.422736
											115	0	0	0	0	0.422736
											116	0	0	0	0	0.422736
											117	0	0	0	0	0.422736
											118	0	0	0	0	0.422736
											119	0	0	0	0	0.422736
					8.01915	121.427	120PheH	120PheN	223270		120	0	0	0	0	0.422736
					7.66182	128.034	121ArgH	121ArgN	6998.12		121	0	0	0	0	0.422736

## Sheet: FL_WT_pS473
PH Domain isolated vs FL pS473 Akt - WT
WT PHD					WT FL Akt pS473
1H CS	15N CS	Assign F1	Assign F2	Height	1H CS	15N CS	Assign F1	Assign F2	Height		Res. Number	Intensity ratio	Diff 1H	Diff 15N	CCSP	SDM
											1	0	0	0	0	0.0368782
											2	0	0	0	0	0.0368782
8.72521	123.918	3AspH	3AspN	14351.3	8.71303	123.715	3AspH	3AspN	43874.4		3	3.05717	-0.01218	-0.20257	0.0239849	0.0368782
7.51128	121.009	4ValH	4ValN	26360.3	7.51128	121.009	4ValH	4ValN	-3428.88		4	0	0	0	0	0.0368782
8.55398	122.657	5AlaH	5AlaN	12776.9	8.58738	122.578	5AlaH	5AlaN	53765.4		5	4.20802	0.0334	-0.07855	0.0343475	0.0368782
8.34025	120.821	6IleH	6IleN	33465.1	8.34358	120.645	6IleH	6IleN	141956		6	4.24191	0.00333	-0.17577	0.0182352	0.0368782
9.24395	129.33	7ValH	7ValN	17057.2	9.22979	129.325	7ValH	7ValN	56215.9		7	3.29573	-0.01416	-0.00474	0.0141683	0.0368782
7.95274	121.621	8LysH	8LysN	31863.8							8	0	0	0	0	0.0368782
											9	0	0	0	0	0.0368782
8.36448	107.783	10GlyH	10GlyN	16508.7	8.31354	107.527	10GlyH	10GlyN	38746.1		10	2.34701	-0.05094	-0.25507	0.0571994	0.0368782
8.63076	119.22	11TrpH	11TrpN	36156.5	8.62182	119.093	11TrpH	11TrpN	148977		11	4.12034	-0.00894	-0.12735	0.0157688	0.0368782
9.49506	122.162	12LeuH	12LeuN	17594.5	9.45932	122.117	12LeuH	12LeuN	66509.6		12	3.78014	-0.03574	-0.04505	0.0360342	0.0368782
8.21127	118.696	13HisH	13HisN	17017.8	8.16286	118.591	13HisH	13HisN	43551		13	2.55914	-0.04841	-0.10489	0.0495781	0.0368782
8.84989	119.676	14LysH	14LysN	17433.5	8.86868	119.48	14LysH	14LysN	21001.7		14	1.20467	0.01879	-0.19573	0.0274161	0.0368782
7.93189	131.937	15ArgH	15ArgN	17043.3	7.86562	132.46	15ArgH	15ArgN	16875.1		15	0.990131	-0.06627	0.52389	0.0851305	0.0368782
8.35542	115.672	16GlyH	16GlyN	18648.3	8.35542	115.672	16GlyH	16GlyN	7606.48		16	0.407891	0	0	0	0.0368782
											17	0	0	0	0	0.0368782
											18	0	0	0	0	0.0368782
8.21741	120.413	19IleH	19IleN	17588.5	8.21741	120.413	19IleH	19IleN	-10046.6		19	0	0	0	0	0.0368782
8.58526	119.336	20LysH	20LysN	27310.5	8.58526	119.336	20LysH	20LysN	35204.9		20	1.28906	0	0	0	0.0368782
7.52652	114.265	21ThrH	21ThrN	39778.4	7.52652	114.265	21ThrH	21ThrN	-252.414		21	0	0	0	0	0.0368782
8.6118	124.102	22TrpH	22TrpN	42632.9	8.63985	123.737	22TrpH	22TrpN	16307.1		22	0.3825	0.02805	-0.36451	0.0465742	0.0368782
8.79046	122.37	23ArgH	23ArgN	16107.3	8.73896	122.539	23ArgH	23ArgN	14868.3		23	0.923078	-0.0515	0.16884	0.0543032	0.0368782
											24	0	0	0	0	0.0368782
9.56288	126.57	25ArgH	25ArgN	15346.2	9.58549	127.271	25ArgH	25ArgN	34988.8		25	2.27997	0.02261	0.70143	0.0750335	0.0368782
8.66024	126.991	26TyrH	26TyrN	17200.7	8.66024	126.991	26TyrH	26TyrN	13079.7		26	0.760417	0	0	0	0.0368782
8.44973	128.638	27PheH	27PheN	14106.6	8.44147	128.599	27PheH	27PheN	63296.1		27	4.48698	-0.00826	-0.03826	0.00913549	0.0368782
9.14612	117.638	28LeuH	28LeuN	9964.58	9.10518	117.693	28LeuH	28LeuN	26271.7		28	2.63651	-0.04094	0.05536	0.0413276	0.0368782
9.03454	123.878	29LeuH	29LeuN	15691.2	9.08328	124.027	29LeuH	29LeuN	74998.4		29	4.77965	0.04874	0.14843	0.0510373	0.0368782
9.28477	125.934	30LysH	30LysN	17230.7	9.3368	126.564	30LysH	30LysN	36444.8		30	2.11511	0.05203	0.6304	0.0827147	0.0368782
											31	0	0	0	0	0.0368782
7.34104	116.618	32AspH	32AspN	26746	7.34104	116.618	32AspH	32AspN	64503.7		32	2.41171	0	0	0	0.0368782
8.13822	108.132	33GlyH	33GlyN	21977.3	8.12647	107.99	33GlyH	33GlyN	49361.4		33	2.24602	-0.01175	-0.14152	0.0186127	0.0368782
7.82307	121.867	34ThrH	34ThrN	14603.4	7.82887	121.868	34ThrH	34ThrN	131606		34	9.01201	0.0058	0.00092	0.00580076	0.0368782
8.01923	128.725	35PheH	35PheN	30221	8.01178	128.64	35PheH	35PheN	218070		35	7.21584	-0.00745	-0.08477	0.0114134	0.0368782
											36	0	0	0	0	0.0368782
8.08232	111.477	37GlyH	37GlyN	13978.3	8.08232	111.477	37GlyH	37GlyN	32.9219		37	0.00235521	0	0	0	0.0368782
8.71028	121.133	38TyrH	38TyrN	16037.2	8.72229	121.163	38TyrH	38TyrN	10930.2		38	0.681553	0.01201	0.03001	0.0123939	0.0368782
8.94757	121.362	39LysH	39LysN	27737.4	8.88537	121.28	39LysH	39LysN	28423		39	1.02472	-0.0622	-0.08165	0.0627551	0.0368782
8.36314	122.43	40GluH	40GluN	22227.9	8.36289	122.299	40GluH	40GluN	238359		40	10.7234	-0.00025	-0.13071	0.0133348	0.0368782
8.12764	122.75	41ArgH	41ArgN	59749.8	8.15063	122.805	41ArgH	41ArgN	596689		41	9.98646	0.02299	0.05426	0.0236468	0.0368782
											42	0	0	0	0	0.0368782
8.2649	123.066	43GlnH	43GlnN	31030	8.21246	122.727	43GlnH	43GlnN	75442.9		43	2.43129	-0.05244	-0.33844	0.0627825	0.0368782
8.67002	117.562	44AspH	44AspN	21818.8	8.65657	117.43	44AspH	44AspN	62111.9		44	2.84671	-0.01345	-0.13205	0.0190347	0.0368782
											45	0	0	0	0	0.0368782
											46	0	0	0	0	0.0368782
											47	0	0	0	0	0.0368782
											48	0	0	0	0	0.0368782
7.60857	127.674	49GluH	49GluN	54945.6	7.60857	127.674	49GluH	49GluN	-9124.28		49	0	0	0	0	0.0368782
											50	0	0	0	0	0.0368782
											51	0	0	0	0	0.0368782
8.01942	121.924	52LeuH	52LeuN	47143.4	8.02342	122.03	52LeuH	52LeuN	251791		52	5.34096	0.004	0.10597	0.0115253	0.0368782
											53	0	0	0	0	0.0368782
8.62627	121.096	54AsnH	54AsnN	10433.7	8.62627	121.096	54AsnH	54AsnN	3774.63		54	0.361773	0	0	0	0.0368782
8.89615	121.782	55PheH	55PheN	12754	8.88272	121.733	55PheH	55PheN	31313.1		55	2.45516	-0.01343	-0.04995	0.0143639	0.0368782
8.53162	113.413	56SerH	56SerN	8655.44	8.53162	113.413	56SerH	56SerN	1962.36		56	0.22672	0	0	0	0.0368782
8.90851	119.179	57ValH	57ValN	18940.9	8.86507	119.066	57ValH	57ValN	24728.4		57	1.30556	-0.04344	-0.11348	0.0449557	0.0368782
8.04312	124.268	58AlaH	58AlaN	17996.4	8.00243	123.83	58AlaH	58AlaN	26415		58	1.46779	-0.04069	-0.43851	0.0604671	0.0368782
											59	0	0	0	0	0.0368782
											60	0	0	0	0	0.0368782
7.48449	115.138	61GlnH	61GlnN	14153.4	7.48449	115.138	61GlnH	61GlnN	-388.492		61	0	0	0	0	0.0368782
8.58378	121.338	62LeuH	62LeuN	20485.9	8.58448	121.383	62LeuH	62LeuN	-14952.4		62	0	0.0007	0.04524	0.00466727	0.0368782
9.20202	126.288	63MetH	63MetN	22344.1	9.17619	126.207	63MetH	63MetN	122601		63	5.48695	-0.02583	-0.08109	0.027122	0.0368782
8.78413	124.226	64LysH	64LysN	19209.3	8.77719	124.112	64LysH	64LysN	131520		64	6.84668	-0.00694	-0.11474	0.0136064	0.0368782
8.00814	116.517	65ThrH	65ThrN	26699.7	8.00814	116.517	65ThrH	65ThrN	68967.7		65	2.58309	0	0	0	0.0368782
8.27758	120.092	66GluH	66GluN	27586.2	8.24526	119.926	66GluH	66GluN	77950.2		66	2.8257	-0.03232	-0.16581	0.0364777	0.0368782
7.62678	118.037	67ArgH	67ArgN	22209.7	7.64228	117.95	67ArgH	67ArgN	73511.6		67	3.30989	0.0155	-0.08684	0.0178524	0.0368782
											68	0	0	0	0	0.0368782
7.20838	119.678	69ArgH	69ArgN	11570.2	7.19617	119.621	69ArgH	69ArgN	74062.5		69	6.40114	-0.01221	-0.05692	0.0135201	0.0368782
											70	0	0	0	0	0.0368782
8.78211	113.421	71AsnH	71AsnN	28271.9	8.79461	113.513	71AsnH	71AsnN	96977.2		71	3.43016	0.0125	0.09237	0.0156531	0.0368782
											72	0	0	0	0	0.0368782
9.46436	123.724	73PheH	73PheN	10564.7	9.45978	123.656	73PheH	73PheN	40455		73	3.82926	-0.00458	-0.06867	0.00836882	0.0368782
9.18578	122.645	74IleH	74IleN	13348.8	9.15219	122.561	74IleH	74IleN	38965.8		74	2.91905	-0.03359	-0.08417	0.0346698	0.0368782
9.1444	124.225	75IleH	75IleN	10142.2	9.1444	124.225	75IleH	75IleN	8456.1		75	0.833754	0	0	0	0.0368782
											76	0	0	0	0	0.0368782
											77	0	0	0	0	0.0368782
											78	0	0	0	0	0.0368782
7.93884	121.013	79GlnH	79GlnN	67823	7.90784	121.006	79GlnH	79GlnN	164743		79	2.42901	-0.031	-0.00723	0.0310088	0.0368782
7.84622	119.37	80TrpH	80TrpN	21574.8	7.80941	119.142	80TrpH	80TrpN	74134.2		80	3.43615	-0.03681	-0.22797	0.0435394	0.0368782
7.93155	119.142	81ThrH	81ThrN	25940.6	7.90702	119.003	81ThrH	81ThrN	76552.5		81	2.95107	-0.02453	-0.13965	0.0283658	0.0368782
8.48747	110.022	82ThrH	82ThrN	20131.3	8.47105	109.89	82ThrH	82ThrN	47224.7		82	2.34583	-0.01642	-0.13266	0.0212771	0.0368782
7.98318	118.624	83ValH	83ValN	23562.2	7.94204	118.47	83ValH	83ValN	45708.6		83	1.93991	-0.04114	-0.15389	0.0440328	0.0368782
7.72813	121.071	84IleH	84IleN	32795.5	7.72813	121.071	84IleH	84IleN	3157.06		84	0.0962651	0	0	0	0.0368782
7.77826	120.673	85GluH	85GluN	28138.6	7.76014	120.583	85GluH	85GluN	71419.4		85	2.53813	-0.01812	-0.09049	0.0203354	0.0368782
7.59642	120.41	86ArgH	86ArgN	18292.7	7.58664	120.222	86ArgH	86ArgN	72925.3		86	3.98658	-0.00978	-0.18831	0.0215541	0.0368782
7.79859	123.485	87ThrH	87ThrN	18579.1	7.77583	123.172	87ThrH	87ThrN	42408.3		87	2.28258	-0.02276	-0.31246	0.0391634	0.0368782
8.51467	123.287	88PheH	88PheN	21722.3	8.5083	123.094	88PheH	88PheN	40305		88	1.85547	-0.00637	-0.1929	0.0206812	0.0368782
9.28761	118.156	89HisH	89HisN	14059.9	9.28248	118.167	89HisH	89HisN	46218.7		89	3.28727	-0.00513	0.01048	0.00524019	0.0368782
6.97912	117.071	90ValH	90ValN	29878.5	6.97912	117.071	90ValH	90ValN	15714		90	0.52593	0	0	0	0.0368782
											91	0	0	0	0	0.0368782
											92	0	0	0	0	0.0368782
											93	0	0	0	0	0.0368782
											94	0	0	0	0	0.0368782
											95	0	0	0	0	0.0368782
											96	0	0	0	0	0.0368782
											97	0	0	0	0	0.0368782
											98	0	0	0	0	0.0368782
7.9119	119.517	99TrpH	99TrpN	46093.7	7.91429	119.593	99TrpH	99TrpN	108706		99	2.35837	0.00239	0.07586	0.00809842	0.0368782
7.59644	117.072	100ThrH	100ThrN	35746	7.55926	116.976	100ThrH	100ThrN	56588.5		100	1.58307	-0.03718	-0.09562	0.038438	0.0368782
8.14875	118.935	101ThrH	101ThrN	19607.4	8.14601	118.919	101ThrH	101ThrN	49285.7		101	2.51363	-0.00274	-0.01638	0.00320921	0.0368782
7.39475	126.027	102AlaH	102AlaN	20960.2	7.37106	125.841	102AlaH	102AlaN	43973.9		102	2.09797	-0.02369	-0.18518	0.0302983	0.0368782
8.16536	117.351	103IleH	103IleN	21893	8.16536	117.351	103IleH	103IleN	26790.8		103	1.22372	0	0	0	0.0368782
7.8678	118.188	104GlnH	104GlnN	20712.4	7.94542	117.666	104GlnH	104GlnN	29125.4		104	1.40618	0.07762	-0.52146	0.0940953	0.0368782
											105	0	0	0	0	0.0368782
7.36032	120.025	106ValH	106ValN	14044.7	7.36905	120.139	106ValH	106ValN	38593.1		106	2.74788	0.00873	0.11398	0.0145388	0.0368782
7.08209	117.006	107AlaH	107AlaN	30605.6	7.03895	117.121	107AlaH	107AlaN	48293.1		107	1.57792	-0.04314	0.11564	0.0447235	0.0368782
8.49678	116.413	108AspH	108AspN	27811.6	8.46807	116.282	108AspH	108AspN	103836		108	3.73355	-0.02871	-0.13055	0.0316478	0.0368782
7.86069	108.589	109GlyH	109GlyN	18395.2	7.86069	108.589	109GlyH	109GlyN	5591.8		109	0.303981	0	0	0	0.0368782
											110	0	0	0	0	0.0368782
											111	0	0	0	0	0.0368782
											112	0	0	0	0	0.0368782
											113	0	0	0	0	0.0368782
											114	0	0	0	0	0.0368782
											115	0	0	0	0	0.0368782
											116	0	0	0	0	0.0368782
											117	0	0	0	0	0.0368782
											118	0	0	0	0	0.0368782
											119	0	0	0	0	0.0368782
											120	0	0	0	0	0.0368782
											121	0	0	0	0	0.0368782

## Sheet: FL_R86A_pS473
PH Domain isolated vs FL pS473 Akt - R86A
R86A PHD					R86A FL Akt pS473
1H CS	15N CS	Assign F1	Assign F2	Height	1H CS	15N CS	Assign F1	Assign F2	Height		Res. Number	Intensity ratio	Diff 1H	Diff 15N	CCSP	SDM
											1	0	0	0	0	0.0559163
8.28047	122.44	2SerH	2SerN	52466.5							2	0	0	0	0	0.0559163
8.44775	122.851	3AspH	3AspN	24944.8	8.39978	122.554	3AspH	3AspN	201043		3	8.05952	-0.04797	-0.29709	0.0567398	0.0559163
8.19829	123.292	4ValH	4ValN	111217	8.18765	123.103	4ValH	4ValN	1104750		4	9.93328	-0.01064	-0.18947	0.0220613	0.0559163
8.08751	129.563	5AlaH	5AlaN	42430.3	8.06981	129.085	5AlaH	5AlaN	339335		5	7.99747	-0.0177	-0.47835	0.051903	0.0559163
8.48313	121.38	6IleH	6IleN	31673.6	8.40838	120.967	6IleH	6IleN	347645		6	10.9759	-0.07475	-0.41257	0.0857815	0.0559163
9.33783	130.165	7ValH	7ValN	14414.9	9.29461	129.665	7ValH	7ValN	67187		7	4.66094	-0.04322	-0.50063	0.0668994	0.0559163
7.51509	120.585	8LysH	8LysN	22785.3	7.46732	120.216	8LysH	8LysN	76794.3		8	3.37034	-0.04777	-0.369	0.0608161	0.0559163
											9	0	0	0	0	0.0559163
8.34353	108.182	10GlyH	10GlyN	23714.6	8.31162	107.727	10GlyH	10GlyN	127558		10	5.37888	-0.03191	-0.4559	0.0563974	0.0559163
8.68542	119.336	11TrpH	11TrpN	28796.7	8.64735	119.112	11TrpH	11TrpN	261874		11	9.09389	-0.03807	-0.22342	0.0443695	0.0559163
9.55352	123.395	12LeuH	12LeuN	18386.4	9.50459	123.221	12LeuH	12LeuN	79549.2		12	4.32652	-0.04893	-0.17402	0.0520501	0.0559163
8.00925	119.525	13HisH	13HisN	27195.6	8.03205	119.141	13HisH	13HisN	88084.5		13	3.23892	0.0228	-0.38415	0.045334	0.0559163
9.45701	127.468	14LysH	14LysN	9951.98	9.50717	128.191	14LysH	14LysN	31075.4		14	3.12254	0.05016	0.72271	0.0891635	0.0559163
8.19796	133.461	15ArgH	15ArgN	13385.6	8.19796	133.461	15ArgH	15ArgN	14510.5		15	1.08404	0	0	0	0.0559163
8.46769	116.053	16GlyH	16GlyN	18008.5	8.37715	116.539	16GlyH	16GlyN	47916.8		16	2.66079	-0.09054	0.48575	0.10321	0.0559163
8.26751	122.643	17GluH	17GluN	32860.7							17	0	0	0	0	0.0559163
8.08769	118.246	18TyrH	18TyrN	12189.7	8.07626	117.692	18TyrH	18TyrN	25224.2		18	2.0693	-0.01143	-0.55397	0.0576494	0.0559163
7.76385	121.073	19IleH	19IleN	36408.8	7.78184	120.962	19IleH	19IleN	84188		19	2.3123	0.01799	-0.11091	0.0212514	0.0559163
											20	0	0	0	0	0.0559163
7.5732	115.309	21ThrH	21ThrN	50585.9	7.5732	115.309	21ThrH	21ThrN	-4260.87		21	0	0	0	0	0.0559163
8.63016	124.812	22TrpH	22TrpN	28910	8.5033	124.982	22TrpH	22TrpN	40084.3		22	1.38652	-0.12686	0.17017	0.128042	0.0559163
8.83943	123.02	23ArgH	23ArgN	17529.3	8.83943	123.02	23ArgH	23ArgN	-6894.95		23	0	0	0	0	0.0559163
											24	0	0	0	0	0.0559163
9.68509	127.487	25ArgH	25ArgN	14638.7	9.60837	127.647	25ArgH	25ArgN	36465.4		25	2.49103	-0.07672	0.16019	0.0784406	0.0559163
8.8321	128.13	26TyrH	26TyrN	16294	8.7525	127.956	26TyrH	26TyrN	76266.8		26	4.68067	-0.0796	-0.17419	0.0815588	0.0559163
8.53123	129.412	27PheH	27PheN	19993.3	8.50345	129.093	27PheH	27PheN	109444		27	5.47403	-0.02778	-0.3194	0.0428148	0.0559163
9.11236	117.891	28LeuH	28LeuN	18648.6	9.12564	117.791	28LeuH	28LeuN	83590.5		28	4.4824	0.01328	-0.1001	0.0167513	0.0559163
9.23593	124.89	29LeuH	29LeuN	16470.5	9.24432	124.707	29LeuH	29LeuN	68515.8		29	4.15991	0.00839	-0.18327	0.02049	0.0559163
9.3495	126.686	30LysH	30LysN	14573.5	9.31377	126.497	30LysH	30LysN	190136		30	13.0467	-0.03573	-0.18882	0.0405902	0.0559163
8.6934	117.883	31AsnH	31AsnN	21737.5	8.66339	117.535	31AsnH	31AsnN	137767		31	6.33776	-0.03001	-0.34744	0.0464383	0.0559163
7.4183	117.149	32AspH	32AspN	31893.5	7.42322	116.98	32AspH	32AspN	88098.6		32	2.76227	0.00492	-0.16871	0.0178979	0.0559163
8.18561	108.315	33GlyH	33GlyN	30927.8	8.16133	108.005	33GlyH	33GlyN	69910.9		33	2.26045	-0.02428	-0.31044	0.0399022	0.0559163
8.02751	116.88	34ThrH	34ThrN	31069.1	8.03041	116.475	34ThrH	34ThrN	46956.6		34	1.51136	0.0029	-0.40467	0.0413781	0.0559163
8.62817	130.243	35PheH	35PheN	16083.4	8.58639	129.818	35PheH	35PheN	57543.1		35	3.57779	-0.04178	-0.42469	0.0601835	0.0559163
8.62831	122.408	36IleH	36IleN	17840.4	8.62831	122.408	36IleH	36IleN	4420.25		36	0.247766	0	0	0	0.0559163
7.95312	111.459	37GlyH	37GlyN	17737.4	7.95312	111.459	37GlyH	37GlyN	4290.85		37	0.24191	0	0	0	0.0559163
8.72732	121.693	38TyrH	38TyrN	11160.7	8.72732	121.693	38TyrH	38TyrN	-3292.3		38	0	0	0	0	0.0559163
8.9382	121.874	39LysH	39LysN	12291.6	8.82063	121.484	39LysH	39LysN	57807.1		39	4.70298	-0.11757	-0.38961	0.124105	0.0559163
											40	0	0	0	0	0.0559163
											41	0	0	0	0	0.0559163
											42	0	0	0	0	0.0559163
											43	0	0	0	0	0.0559163
											44	0	0	0	0	0.0559163
											45	0	0	0	0	0.0559163
											46	0	0	0	0	0.0559163
											47	0	0	0	0	0.0559163
8.11274	121.332	48ArgH	48ArgN	82342.9	8.15943	121.574	48ArgH	48ArgN	640183		48	7.7746	0.04669	0.24213	0.0528196	0.0559163
											49	0	0	0	0	0.0559163
8.46522	127.417	50AlaH	50AlaN	39384.7	8.40764	127.241	50AlaH	50AlaN	248120		50	6.29991	-0.05758	-0.17568	0.0603039	0.0559163
											51	0	0	0	0	0.0559163
											52	0	0	0	0	0.0559163
											53	0	0	0	0	0.0559163
											54	0	0	0	0	0.0559163
7.97817	120.019	55PheH	55PheN	42944.8	7.96349	119.913	55PheH	55PheN	340777		55	7.93523	-0.01468	-0.10651	0.0182628	0.0559163
8.93738	116.459	56SerH	56SerN	5058.29	8.93738	116.459	56SerH	56SerN	-3433		56	0	0	0	0	0.0559163
9.03638	119.387	57ValH	57ValN	21357.6	9.00383	119.274	57ValH	57ValN	95841.3		57	4.48746	-0.03255	-0.11272	0.0345209	0.0559163
7.7263	123.524	58AlaH	58AlaN	46754.4	7.69002	122.999	58AlaH	58AlaN	42248.5		58	0.903626	-0.03628	-0.52466	0.0646539	0.0559163
											59	0	0	0	0	0.0559163
7.84919	117.804	60CysH	60CysN	27423.3	7.94381	117.606	60CysH	60CysN	58014.6		60	2.11552	0.09462	-0.19728	0.096736	0.0559163
											61	0	0	0	0	0.0559163
8.74996	126.328	62LeuH	62LeuN	30556.2	8.72028	125.897	62LeuH	62LeuN	139041		62	4.55034	-0.02968	-0.43093	0.0530371	0.0559163
9.02553	122.693	63MetH	63MetN	25854.8	9.0233	122.178	63MetH	63MetN	69732.9		63	2.6971	-0.00223	-0.51521	0.0525987	0.0559163
8.81064	124.63	64LysH	64LysN	17832.8	8.78171	124.439	64LysH	64LysN	160287		64	8.98832	-0.02893	-0.19101	0.0348788	0.0559163
8.07126	116.849	65ThrH	65ThrN	30396.6	8.06196	116.724	65ThrH	65ThrN	117108		65	3.85267	-0.0093	-0.12532	0.0158078	0.0559163
8.31375	120.287	66GluH	66GluN	18490.3	8.26885	120.226	66GluH	66GluN	60670.8		66	3.28122	-0.0449	-0.06095	0.0453284	0.0559163
7.6771	118.42	67ArgH	67ArgN	28347	7.71433	118.31	67ArgH	67ArgN	88969.8		67	3.1386	0.03723	-0.11034	0.038894	0.0559163
											68	0	0	0	0	0.0559163
7.28025	120.112	69ArgH	69ArgN	23624	7.22056	119.825	69ArgH	69ArgN	137592		69	5.82425	-0.05969	-0.28673	0.0664699	0.0559163
											70	0	0	0	0	0.0559163
8.77745	113.827	71AsnH	71AsnN	14425.1	8.83166	113.984	71AsnH	71AsnN	118025		71	8.18192	0.05421	0.15677	0.0565192	0.0559163
7.55426	116.867	72ThrH	72ThrN	32197	7.54644	116.945	72ThrH	72ThrN	56062.5		72	1.74123	-0.00782	0.07759	0.0111259	0.0559163
9.53145	123.977	73PheH	73PheN	17470.1	9.55264	123.981	73PheH	73PheN	67200.2		73	3.84658	0.02119	0.00428	0.0211945	0.0559163
9.16398	123.399	74IleH	74IleN	17341.6	9.14556	123.241	74IleH	74IleN	95289.4		74	5.49484	-0.01842	-0.15784	0.0244642	0.0559163
9.15551	124.374	75IleH	75IleN	19692.8	9.15551	124.374	75IleH	75IleN	8698.77		75	0.441723	0	0	0	0.0559163
8.69676	127.511	76ArgH	76ArgN	21489.6	8.70509	127.445	76ArgH	76ArgN	32798.9		76	1.52627	0.00833	-0.06568	0.0106897	0.0559163
8.95696	123.765	77CysH	77CysN	7013.79	8.95696	123.765	77CysH	77CysN	2927.89		77	0.417448	0	0	0	0.0559163
											78	0	0	0	0	0.0559163
											79	0	0	0	0	0.0559163
											80	0	0	0	0	0.0559163
8.23426	113.07	81ThrH	81ThrN	20027.6	8.23426	113.07	81ThrH	81ThrN	-10017.1		81	0	0	0	0	0.0559163
8.15045	120.248	82ThrH	82ThrN	34541.7	8.15045	120.248	82ThrH	82ThrN	-57271.9		82	0	0	0	0	0.0559163
8.49305	127.021	83ValH	83ValN	22769.5	8.49305	127.021	83ValH	83ValN	7456.73		83	0.327488	0	0	0	0.0559163
											84	0	0	0	0	0.0559163
											85	0	0	0	0	0.0559163
8.76995	129.044	86AlaH	86AlaN	16008.4	8.76995	129.044	86AlaH	86AlaN	6195.05		86	0.386987	0	0	0	0.0559163
8.06109	118.919	87ThrH	87ThrN	21764.2	8.06109	118.919	87ThrH	87ThrN	7072.49		87	0.32496	0	0	0	0.0559163
8.8407	124.259	88PheH	88PheN	17271.7	8.83511	123.986	88PheH	88PheN	70198.3		88	4.06435	-0.00559	-0.27313	0.0284145	0.0559163
9.35055	118.701	89HisH	89HisN	16208.5	9.37806	118.739	89HisH	89HisN	68346		89	4.21668	0.02751	0.03832	0.0277863	0.0559163
7.02587	117.07	90ValH	90ValN	15782.9	7.03036	117.607	90ValH	90ValN	53929.4		90	3.41695	0.00449	0.53709	0.0549669	0.0559163
8.54802	116.563	91GluH	91GluN	28632	8.46595	116.32	91GluH	91GluN	114142		91	3.98652	-0.08207	-0.24333	0.0857409	0.0559163
7.08986	105.236	92ThrH	92ThrN	47252.1	7.09216	105.252	92ThrH	92ThrN	150349		92	3.18185	0.0023	0.01657	0.00285422	0.0559163
											93	0	0	0	0	0.0559163
9.05436	121.544	94GluH	94GluN	29137.4	9.07998	121.21	94GluH	94GluN	153863		94	5.2806	0.02562	-0.33401	0.0426273	0.0559163
7.80481	121.243	95GluH	95GluN	29089.1	7.8016	120.961	95GluH	95GluN	103618		95	3.56209	-0.00321	-0.28195	0.0289375	0.0559163
7.56664	120.711	96ArgH	96ArgN	33784.7	7.56738	120.585	96ArgH	96ArgN	88686.5		96	2.62505	0.00074	-0.1261	0.0128835	0.0559163
											97	0	0	0	0	0.0559163
7.9192	119.783	98GluH	98GluN	37116.7	7.89854	119.513	98GluH	98GluN	125834		98	3.39023	-0.02066	-0.26988	0.0344182	0.0559163
7.8695	119.48	99TrpH	99TrpN	25806.8	7.88481	119.176	99TrpH	99TrpN	76755.9		99	2.97425	0.01531	-0.3043	0.0346091	0.0559163
8.523	110.258	100ThrH	100ThrN	27829.7	8.46373	109.898	100ThrH	100ThrN	73118.2		100	2.62734	-0.05927	-0.36064	0.0697574	0.0559163
8.22447	119.295	101ThrH	101ThrN	36449.5	8.18341	119.067	101ThrH	101ThrN	84605.8		101	2.32118	-0.04106	-0.22779	0.0471781	0.0559163
7.41016	126.598	102AlaH	102AlaN	37048.1	7.45362	126.297	102AlaH	102AlaN	91520.2		102	2.47031	0.04346	-0.30111	0.0532172	0.0559163
8.14382	117.673	103IleH	103IleN	27173.5	8.12543	117.352	103IleH	103IleN	85329.8		103	3.14018	-0.01839	-0.32112	0.0375637	0.0559163
7.90865	118.724	104GlnH	104GlnN	32617.2	7.84907	118.329	104GlnH	104GlnN	90433.7		104	2.77258	-0.05958	-0.39453	0.0718971	0.0559163
8.20547	115.921	105ThrH	105ThrN	37744	8.15465	115.449	105ThrH	105ThrN	67583.9		105	1.79059	-0.05082	-0.47222	0.0700191	0.0559163
7.82894	123.978	106ValH	106ValN	36699.5	7.80796	123.63	106ValH	106ValN	69985.5		106	1.90699	-0.02098	-0.34803	0.0412352	0.0559163
8.486	123.92	107AlaH	107AlaN	41829.1	8.46806	123.467	107AlaH	107AlaN	61503.8		107	1.47036	-0.01794	-0.45251	0.0495199	0.0559163
8.89628	119.962	108AspH	108AspN	30737.5	8.80488	119.479	108AspH	108AspN	55791.9		108	1.81511	-0.0914	-0.48288	0.103826	0.0559163
7.86682	108.783	109GlyH	109GlyN	31879.8	7.86682	108.783	109GlyH	109GlyN	2349.12		109	0.0736867	0	0	0	0.0559163
7.47041	121.629	110LeuH	110LeuN	41713.1	7.4601	121.685	110LeuH	110LeuN	33092		110	0.793324	-0.01031	0.05591	0.0117821	0.0559163
7.54617	121.516	111LysH	111LysN	46851	7.58484	121.728	111LysH	111LysN	95957.8		111	2.04815	0.03867	0.21236	0.0443233	0.0559163
											112	0	0	0	0	0.0559163
											113	0	0	0	0	0.0559163
											114	0	0	0	0	0.0559163
											115	0	0	0	0	0.0559163
											116	0	0	0	0	0.0559163
											117	0	0	0	0	0.0559163
											118	0	0	0	0	0.0559163
											119	0	0	0	0	0.0559163
8.01915	121.427	120PheH	120PheN	223270	8.05787	121.255	120PheH	120PheN	661263		120	2.96172	0.03872	-0.17201	0.0425096	0.0559163
7.66182	128.034	121ArgH	121ArgN	6998.12	7.62677	127.802	121ArgH	121ArgN	26741.4		121	3.82123	-0.03505	-0.23158	0.0422666	0.0559163

## Sheet: FL_WT_R86A_pS473
FL WT pS473 Akt vs FL R86A pS473 Akt
WT FL Akt pS473					R86A FL Akt pS473
1H CS	15N CS	Assign F1	Assign F2	Height	1H CS	15N CS	Assign F1	Assign F2	Height		Res. Number	Intensity ratio	Diff 1H	Diff 15N	CCSP	SDM
											1	0	0	0	0	0.390086
											2	0	0	0	0	0.390086
8.71303	123.715	3AspH	3AspN	43874.4	8.39978	122.554	3AspH	3AspN	201043		3	4.58224	-0.31325	-1.16087	0.334882	0.390086
7.51128	121.009	4ValH	4ValN	-3428.88	8.18765	123.103	4ValH	4ValN	1104750		4	0	0.67637	2.09425	0.7093	0.390086
8.58738	122.578	5AlaH	5AlaN	53765.4	8.06981	129.085	5AlaH	5AlaN	339335		5	6.3114	-0.51757	6.50657	0.841627	0.390086
8.34358	120.645	6IleH	6IleN	141956	8.40838	120.967	6IleH	6IleN	347645		6	2.44896	0.0648	0.32158	0.0726289	0.390086
9.22979	129.325	7ValH	7ValN	56215.9	9.29461	129.665	7ValH	7ValN	67187		7	1.19516	0.06482	0.34001	0.0735147	0.390086
					7.46732	120.216	8LysH	8LysN	76794.3		8	0	0	0	0	0.390086
											9	0	0	0	0	0.390086
8.31354	107.527	10GlyH	10GlyN	38746.1	8.31162	107.727	10GlyH	10GlyN	127558		10	3.29215	-0.00192	0.1991	0.0203988	0.390086
8.62182	119.093	11TrpH	11TrpN	148977	8.64735	119.112	11TrpH	11TrpN	261874		11	1.75781	0.02553	0.01936	0.0256063	0.390086
9.45932	122.117	12LeuH	12LeuN	66509.6	9.50459	123.221	12LeuH	12LeuN	79549.2		12	1.19606	0.04527	1.10418	0.121384	0.390086
8.16286	118.591	13HisH	13HisN	43551	8.03205	119.141	13HisH	13HisN	88084.5		13	2.02256	-0.13081	0.54991	0.142329	0.390086
8.86868	119.48	14LysH	14LysN	21001.7	9.50717	128.191	14LysH	14LysN	31075.4		14	1.47966	0.63849	8.71017	1.09407	0.390086
7.86562	132.46	15ArgH	15ArgN	16875.1	8.19796	133.461	15ArgH	15ArgN	14510.5		15	0.859876	0.33234	1.00012	0.347644	0.390086
8.35542	115.672	16GlyH	16GlyN	7606.48	8.37715	116.539	16GlyH	16GlyN	47916.8		16	6.29947	0.02173	0.86642	0.0910072	0.390086
											17	0	0	0	0	0.390086
					8.07626	117.692	18TyrH	18TyrN	25224.2		18	0	8.07626	117.692	14.4685	0.390086
8.21741	120.413	19IleH	19IleN	-10046.6	7.78184	120.962	19IleH	19IleN	84188		19	0	-0.43557	0.54892	0.439154	0.390086
8.58526	119.336	20LysH	20LysN	35204.9							20	0	0	0	0	0.390086
7.52652	114.265	21ThrH	21ThrN	-252.414	7.5732	115.309	21ThrH	21ThrN	-4260.87		21	16.8805	0.04668	1.04469	0.116334	0.390086
8.63985	123.737	22TrpH	22TrpN	16307.1	8.5033	124.982	22TrpH	22TrpN	40084.3		22	2.45809	-0.13655	1.24475	0.186456	0.390086
8.73896	122.539	23ArgH	23ArgN	14868.3	8.83943	123.02	23ArgH	23ArgN	-6894.95		23	0	0.10047	0.48031	0.111778	0.390086
											24	0	0	0	0	0.390086
9.58549	127.271	25ArgH	25ArgN	34988.8	9.60837	127.647	25ArgH	25ArgN	36465.4		25	1.0422	0.02288	0.37607	0.0446645	0.390086
8.66024	126.991	26TyrH	26TyrN	13079.7	8.7525	127.956	26TyrH	26TyrN	76266.8		26	5.83093	0.09226	0.96429	0.134856	0.390086
8.44147	128.599	27PheH	27PheN	63296.1	8.50345	129.093	27PheH	27PheN	109444		27	1.72908	0.06198	0.49332	0.0798341	0.390086
9.10518	117.693	28LeuH	28LeuN	26271.7	9.12564	117.791	28LeuH	28LeuN	83590.5		28	3.18177	0.02046	0.09728	0.0227391	0.390086
9.08328	124.027	29LeuH	29LeuN	74998.4	9.24432	124.707	29LeuH	29LeuN	68515.8		29	0.913563	0.16104	0.68019	0.175349	0.390086
9.3368	126.564	30LysH	30LysN	36444.8	9.31377	126.497	30LysH	30LysN	190136		30	5.2171	-0.02303	-0.06665	0.0240125	0.390086
					8.66339	117.535	31AsnH	31AsnN	137767		31	0	0	0	0	0.390086
7.34104	116.618	32AspH	32AspN	64503.7	7.42322	116.98	32AspH	32AspN	88098.6		32	1.36579	0.08218	0.36283	0.0901288	0.390086
8.12647	107.99	33GlyH	33GlyN	49361.4	8.16133	108.005	33GlyH	33GlyN	69910.9		33	1.41631	0.03486	0.01445	0.0348911	0.390086
7.82887	121.868	34ThrH	34ThrN	131606	8.03041	116.475	34ThrH	34ThrN	46956.6		34	0.356797	0.20154	-5.39313	0.585856	0.390086
8.01178	128.64	35PheH	35PheN	218070	8.58639	129.818	35PheH	35PheN	57543.1		35	0.263874	0.57461	1.17827	0.587044	0.390086
					8.62831	122.408	36IleH	36IleN	4420.25		36	0	0	0	0	0.390086
8.08232	111.477	37GlyH	37GlyN	32.9219	7.95312	111.459	37GlyH	37GlyN	4290.85		37	130.334	-0.1292	-0.01752	0.129212	0.390086
8.72229	121.163	38TyrH	38TyrN	10930.2	8.72732	121.693	38TyrH	38TyrN	-3292.3		38	0	0.00503	0.52998	0.0542915	0.390086
8.88537	121.28	39LysH	39LysN	28423	8.82063	121.484	39LysH	39LysN	57807.1		39	2.03381	-0.06474	0.20373	0.0679933	0.390086
8.36289	122.299	40GluH	40GluN	238359							40	0	0	0	0	0.390086
8.15063	122.805	41ArgH	41ArgN	596689							41	0	0	0	0	0.390086
											42	0	0	0	0	0.390086
8.21246	122.727	43GlnH	43GlnN	75442.9							43	0	0	0	0	0.390086
8.65657	117.43	44AspH	44AspN	62111.9							44	0	0	0	0	0.390086
											45	0	0	0	0	0.390086
											46	0	0	0	0	0.390086
											47	0	0	0	0	0.390086
					8.15943	121.574	48ArgH	48ArgN	640183		48	0	0	0	0	0.390086
7.60857	127.674	49GluH	49GluN	-9124.28							49	0	0	0	0	0.390086
					8.40764	127.241	50AlaH	50AlaN	248120		50	0	0	0	0	0.390086
											51	0	0	0	0	0.390086
8.02342	122.03	52LeuH	52LeuN	251791							52	0	0	0	0	0.390086
											53	0	0	0	0	0.390086
8.62627	121.096	54AsnH	54AsnN	3774.63							54	0	0	0	0	0.390086
8.88272	121.733	55PheH	55PheN	31313.1	7.96349	119.913	55PheH	55PheN	340777		55	10.8829	-0.91923	-1.81996	0.937787	0.390086
8.53162	113.413	56SerH	56SerN	1962.36	8.93738	116.459	56SerH	56SerN	-3433		56	0	0.40576	3.04586	0.51104	0.390086
8.86507	119.066	57ValH	57ValN	24728.4	9.00383	119.274	57ValH	57ValN	95841.3		57	3.87576	0.13876	0.20869	0.140383	0.390086
8.00243	123.83	58AlaH	58AlaN	26415	7.69002	122.999	58AlaH	58AlaN	42248.5		58	1.59941	-0.31241	-0.83061	0.323694	0.390086
											59	0	0	0	0	0.390086
					7.94381	117.606	60CysH	60CysN	58014.6		60	0	0	0	0	0.390086
7.48449	115.138	61GlnH	61GlnN	-388.492							61	0	0	0	0	0.390086
8.58448	121.383	62LeuH	62LeuN	-14952.4	8.72028	125.897	62LeuH	62LeuN	139041		62	0	0.1358	4.51386	0.480023	0.390086
9.17619	126.207	63MetH	63MetN	122601	9.0233	122.178	63MetH	63MetN	69732.9		63	0.568779	-0.15289	-4.0294	0.438515	0.390086
8.77719	124.112	64LysH	64LysN	131520	8.78171	124.439	64LysH	64LysN	160287		64	1.21873	0.00452	0.32761	0.0337205	0.390086
8.00814	116.517	65ThrH	65ThrN	68967.7	8.06196	116.724	65ThrH	65ThrN	117108		65	1.69801	0.05382	0.20655	0.0577967	0.390086
8.24526	119.926	66GluH	66GluN	77950.2	8.26885	120.226	66GluH	66GluN	60670.8		66	0.778328	0.02359	0.29986	0.0386261	0.390086
7.64228	117.95	67ArgH	67ArgN	73511.6	7.71433	118.31	67ArgH	67ArgN	88969.8		67	1.21028	0.07205	0.36003	0.0808689	0.390086
											68	0	0	0	0	0.390086
7.19617	119.621	69ArgH	69ArgN	74062.5	7.22056	119.825	69ArgH	69ArgN	137592		69	1.85778	0.02439	0.20456	0.0320971	0.390086
											70	0	0	0	0	0.390086
8.79461	113.513	71AsnH	71AsnN	96977.2	8.83166	113.984	71AsnH	71AsnN	118025		71	1.21704	0.03705	0.47081	0.0606537	0.390086
					7.54644	116.945	72ThrH	72ThrN	56062.5		72	0	0	0	0	0.390086
9.45978	123.656	73PheH	73PheN	40455	9.55264	123.981	73PheH	73PheN	67200.2		73	1.66111	0.09286	0.32533	0.098611	0.390086
9.15219	122.561	74IleH	74IleN	38965.8	9.14556	123.241	74IleH	74IleN	95289.4		74	2.44546	-0.00663	0.68032	0.0697086	0.390086
9.1444	124.225	75IleH	75IleN	8456.1	9.15551	124.374	75IleH	75IleN	8698.77		75	1.0287	0.01111	0.14943	0.0188612	0.390086
					8.70509	127.445	76ArgH	76ArgN	32798.9		76	0	0	0	0	0.390086
					8.95696	123.765	77CysH	77CysN	2927.89		77	0	0	0	0	0.390086
											78	0	0	0	0	0.390086
7.90784	121.006	79GlnH	79GlnN	164743							79	0	0	0	0	0.390086
7.80941	119.142	80TrpH	80TrpN	74134.2							80	0	0	0	0	0.390086
7.90702	119.003	81ThrH	81ThrN	76552.5	8.23426	113.07	81ThrH	81ThrN	-10017.1		81	0	0.32724	-5.93227	0.687911	0.390086
8.47105	109.89	82ThrH	82ThrN	47224.7	8.15045	120.248	82ThrH	82ThrN	-57271.9		82	0	-0.3206	10.3584	1.10413	0.390086
7.94204	118.47	83ValH	83ValN	45708.6	8.49305	127.021	83ValH	83ValN	7456.73		83	0.163136	0.55101	8.55133	1.0317	0.390086
7.72813	121.071	84IleH	84IleN	3157.06							84	0	0	0	0	0.390086
7.76014	120.583	85GluH	85GluN	71419.4							85	0	0	0	0	0.390086
7.58664	120.222	86ArgH	86ArgN	72925.3	8.76995	129.044	86AlaH	86AlaN	6195.05		86	0.0849506	1.18331	8.82189	1.48658	0.390086
7.77583	123.172	87ThrH	87ThrN	42408.3	8.06109	118.919	87ThrH	87ThrN	7072.49		87	0.166771	0.28526	-4.25328	0.519216	0.390086
8.5083	123.094	88PheH	88PheN	40305	8.83511	123.986	88PheH	88PheN	70198.3		88	1.74168	0.32681	0.89162	0.339228	0.390086
9.28248	118.167	89HisH	89HisN	46218.7	9.37806	118.739	89HisH	89HisN	68346		89	1.47875	0.09558	0.57272	0.112018	0.390086
6.97912	117.071	90ValH	90ValN	15714	7.03036	117.607	90ValH	90ValN	53929.4		90	3.43193	0.05124	0.53626	0.0749498	0.390086
					8.46595	116.32	91GluH	91GluN	114142		91	0	0	0	0	0.390086
					7.09216	105.252	92ThrH	92ThrN	150349		92	0	0	0	0	0.390086
											93	0	0	0	0	0.390086
					9.07998	121.21	94GluH	94GluN	153863		94	0	0	0	0	0.390086
					7.8016	120.961	95GluH	95GluN	103618		95	0	0	0	0	0.390086
					7.56738	120.585	96ArgH	96ArgN	88686.5		96	0	0	0	0	0.390086
											97	0	0	0	0	0.390086
					7.89854	119.513	98GluH	98GluN	125834		98	0	0	0	0	0.390086
7.91429	119.593	99TrpH	99TrpN	108706	7.88481	119.176	99TrpH	99TrpN	76755.9		99	0.706087	-0.02948	-0.41719	0.0517674	0.390086
7.55926	116.976	100ThrH	100ThrN	56588.5	8.46373	109.898	100ThrH	100ThrN	73118.2		100	1.2921	0.90447	-7.07832	1.1573	0.390086
8.14601	118.919	101ThrH	101ThrN	49285.7	8.18341	119.067	101ThrH	101ThrN	84605.8		101	1.71664	0.0374	0.14838	0.0403463	0.390086
7.37106	125.841	102AlaH	102AlaN	43973.9	7.45362	126.297	102AlaH	102AlaN	91520.2		102	2.08124	0.08256	0.45571	0.0947458	0.390086
8.16536	117.351	103IleH	103IleN	26790.8	8.12543	117.352	103IleH	103IleN	85329.8		103	3.18504	-0.03993	0.00121	0.0399302	0.390086
7.94542	117.666	104GlnH	104GlnN	29125.4	7.84907	118.329	104GlnH	104GlnN	90433.7		104	3.10498	-0.09635	0.66309	0.117719	0.390086
					8.15465	115.449	105ThrH	105ThrN	67583.9		105	0	0	0	0	0.390086
7.36905	120.139	106ValH	106ValN	38593.1	7.80796	123.63	106ValH	106ValN	69985.5		106	1.81342	0.43891	3.49143	0.565215	0.390086
7.03895	117.121	107AlaH	107AlaN	48293.1	8.46806	123.467	107AlaH	107AlaN	61503.8		107	1.27355	1.42911	6.3456	1.56885	0.390086
8.46807	116.282	108AspH	108AspN	103836	8.80488	119.479	108AspH	108AspN	55791.9		108	0.537308	0.33681	3.19636	0.46876	0.390086
7.86069	108.589	109GlyH	109GlyN	5591.8	7.86682	108.783	109GlyH	109GlyN	2349.12		109	0.420101	0.00613	0.19344	0.0206612	0.390086
					7.4601	121.685	110LeuH	110LeuN	33092		110	0	0	0	0	0.390086
					7.58484	121.728	111LysH	111LysN	95957.8		111	0	0	0	0	0.390086
											112	0	0	0	0	0.390086
											113	0	0	0	0	0.390086
											114	0	0	0	0	0.390086
											115	0	0	0	0	0.390086
											116	0	0	0	0	0.390086
											117	0	0	0	0	0.390086
											118	0	0	0	0	0.390086
											119	0	0	0	0	0.390086
					8.05787	121.255	120PheH	120PheN	661263		120	0	0	0	0	0.390086
					7.62677	127.802	121ArgH	121ArgN	26741.4		121	0	0	0	0	0.390086
