# Supplementary material for: PH domain-mediated autoinhibition and oncogenic activation of Akt
Source: eLife journal article supplement (doi:10.7554/elife.80148), 2022-08-15
Supplement: supp [file Figure_3_NMR_relaxation_sourcedata.xlsx]

## Sheet: Relax_800_PH_R86A
	Spin nuclear relaxation at 800 MHz - isolated R86A PH domain
	Res. Number	hNOE	hNOE SDM	R1 (Hz)	R1 SDM (Hz)	R2 (Hz)	R2 SDM (Hz)	Eta_xy (Hz)	Eta_xy SDM (Hz)
	1
	2	0.09947	0.04999	0.813101	0.0329442	3.27998	0.449695	5.73042	2.8799
	3	-0.20066	0.15198	0.976648	0.032402	4.1651	0.297867	2.70008	2.04504
	4	0.0823	0.03864	0.881873	0.0410237	8.89205	0.517899	6.76085	3.17423
	5	0.4864	0.0826	0.782957	0.0269729	13.508	0.83205	12.9334	2.19634
	6	0.67912	0.09504	0.637515	0.0485963	17.2921	1.16915	14.4303	2.01946
	7	0.78274	0.14989	0.614711	0.0660101	17.7305	0.999698	14.3582	2.74951
	8	0.90953	0.15013	0.695101	0.039233	20.024	1.69607	17.5721	2.9005
	9
	10	0.71911	0.08354	0.637056	0.0514931	17.8348	0.804747	12.6322	1.4675
	11	0.9351	0.08644	0.700972	0.0373533	19.4401	0.593332	12.1315	1.12143
	12	0.63054	0.09848	0.590138	0.0512816	15.2369	1.97107	17.7363	2.77012
	13	0.65804	0.086	0.616622	0.0462997	20.4248	1.42256	13.5315	1.76844
	14	0.7305	0.14947	0.543295	0.0643647	27.1887	5.35938	23.7061	4.85059
	15	0.76436	0.14648	0.551828	0.0348486	26.5041	3.53341	13.1642	2.52275
	16	0.73813	0.10601	0.743478	0.0589518	19.6928	2.29193	16.2463	2.33329
	17
	18	0.4246	0.17725	0.702415	0.0838757	14.3885	3.21722	11.6773	4.87471
	19	0.53047	0.06921	0.726982	0.0376822	20.7684	1.41044	16.6738	2.17542
	20
	21	0.56203	0.07706	0.828864	0.0220189	19.1168	1.0123	11.4747	1.5733
	22	0.67074	0.08199	0.734873	0.0262998	23.5516	4.54835	10.8543	1.32681
	23	0.71044	0.10841	0.603369	0.04673	16.4069	1.16288	15.1382	2.31002
	24
	25	0.84985	0.14033	0.668977	0.0616696	26.0892	4.94831	13.9969	2.31122
	26	0.92198	0.12945	0.602061	0.0343303	19.3386	1.39121	26.7786	3.75983
	27	0.88614	0.12845	0.600824	0.0381494	17.8923	1.2037	18.6278	2.70019
	28	0.89325	0.14569	0.576515	0.0482368	17.325	1.79193	16.692	2.72248
	29	0.80487	0.12892	0.602914	0.050262	18.9897	1.48211	12.9803	2.07912
	30	1.24139	0.32695	0.681436	0.116135	17.1762	3.1774	15.1703	3.99546
	31	0.73666	0.09295	0.549505	0.0391667	18.6289	1.00641	13.9184	1.75619
	32	0.72875	0.07829	0.650043	0.0435824	20.6356	1.28174	16.0341	1.72255
	33	0.85368	0.09675	0.729911	0.0446621	18.9825	1.30802	15.5416	1.76138
	34	0.87357	0.10485	0.739486	0.0626952	20.1613	1.2113	18.3516	2.20264
	35	0.81085	0.12996	0.658944	0.0388138	19.7278	1.48279	23.3434	3.74139
	36	0.77194	0.13501	0.633754	0.0690506	20.6782	3.64734	18.7529	3.27983
	37	0.93118	0.15828	0.590169	0.0672566	18.1686	2.19185	17.6867	3.00635
	38	0.91437	0.17074	0.667143	0.0728995	21.8531	2.93699	9.78448	1.82705
	39	1.00912	0.2853	0.829986	0.0916894	16.2311	3.04548	13.3813	3.78319
	40
	41
	42
	43
	44
	45
	46
	47
	48	0.53702	0.05938	1.15935	0.0551081	15.9134	0.425439	11.037	1.2204
	49
	50	0.63674	0.08926	0.769456	0.0505443	15.2999	0.629692	14.107	1.97757
	51
	52
	53
	54
	55	0.47392	0.0606	0.830855	0.0382299	15.4131	0.993012	10.83	1.38483
	56
	57	0.805	0.13883	0.606108	0.0376698	21.5008	1.83064	14.5695	2.51264
	58	0.92764	0.09731	0.691405	0.06901	21.182	0.776208	21.7635	2.28301
	59
	60	0.53969	0.12398	0.725284	0.0399999	19.5427	1.32525	12.778	2.93541
	61	0.6639	0.10003	0.57871	0.0637594	22.1533	1.81584	16.9048	2.54705
	62	0.77778	0.10038	0.579737	0.0376225	19.3836	1.49162	14.9968	1.93548
	63	0.73564	0.10514	0.649861	0.0550663	15.9312	1.1548	15.7306	2.24826
	64	0.81499	0.17925	0.589925	0.0639959	22.5225	2.43487	21.2496	4.67366
	65	0.79469	0.10217	0.719756	0.0511262	18.577	1.08018	16.9546	2.17978
	66	0.99001	0.1488	0.680517	0.0752081	19.5503	1.60531	13.6692	2.0545
	67	0.69638	0.07339	0.660232	0.0380241	25.6016	4.79129	19.488	2.0538
	68
	69	0.65414	0.08712	0.66492	0.0410684	19.6386	2.1405	16.6	2.21083
	70
	71	1.01693	0.17367	0.601967	0.0655481	17.7651	1.71371	14.9046	2.54538
	72	0.68943	0.06343	0.69734	0.0462893	22.5175	1.1966	9.97374	0.91762
	73	0.65609	0.10349	0.754899	0.100514	21.0438	2.25849	15.9195	2.51111
	74	0.88988	0.15202	0.517995	0.0467975	20.6271	1.17431	18.2154	3.11178
	75	1.00967	0.15951	0.577037	0.0484641	19.9164	1.76911	20.1725	3.1869
	76	0.8269	0.12164	0.565135	0.0592668	18.7441	1.16294	14.6704	2.15807
	77
	78
	79
	80
	81	0.60798	0.13285	0.739639	0.0604946	15.7159	1.25964	12.8266	2.80275
	82	0.76809	0.10835	0.896322	0.0649624	30.6748	2.86048	18.8914	2.66489
	83	0.62363	0.14221	0.676242	0.0649828	45.9137	9.08577	17.346	3.95551
	84
	85	0.58654	0.05365	0.925429	0.0284931	17.1615	0.918892	10.579	0.967649
	86	0.87339	0.1718	0.583778	0.0603653	31.0752	4.11375	11.5634	2.27457
	87	0.85884	0.12406	0.596435	0.0449826	18.1851	2.55961	19.4224	2.80559
	88	0.74104	0.11176	0.635372	0.0685197	20.5804	2.04999	16.8042	2.53432
	89	0.87358	0.13672	0.578439	0.0586841	20.4666	1.40745	14.3165	2.24061
	90	0.91976	0.14317	0.571893	0.0353815	27.7855	3.57452	16.2548	2.53023
	91	0.65428	0.09359	0.668163	0.0570151	16.818	0.936221	11.2455	1.60858
	92	0.78953	0.07186	0.649566	0.0346325	19.1608	0.881123	12.2801	1.11769
	93
	94	0.79168	0.08572	0.570727	0.0337423	16.6889	1.30904	15.8171	1.71262
	95	0.81471	0.09783	0.696369	0.0544237	19.9362	0.806828	17.4155	2.09124
	96	0.91488	0.10728	0.687309	0.0438003	23.084	1.40678	16.6876	1.95681
	97	0.80122	0.10887	0.831615	0.0329747	14.476	0.804686	16.1632	2.19627
	98	0.83174	0.07994	0.682212	0.0526336	23.9751	2.72457	17.7499	1.70597
	99	0.82163	0.11268	0.582544	0.0284245	21.9539	1.20011	16.0486	2.20094
	100	0.87222	0.11356	0.59891	0.0271316	23.2721	2.01471	14.8057	1.92765
	101	1.08145	0.13587	0.529697	0.0400218	28.49	1.37174	13.6071	1.70955
	102	0.87431	0.08692	0.683938	0.0455984	22.7273	1.02273	18.6195	1.85107
	103	0.85502	0.11639	0.54126	0.0437218	24.2542	1.57067	16.3897	2.23105
	104	0.73343	0.08327	0.61456	0.0497486	20.1572	2.01938	17.9119	2.03363
	105	0.81851	0.08867	0.675096	0.0543032	20.2963	2.11326	24.1667	2.618
	106	1.17206	0.14543	0.56286	0.0358599	14.1723	1.16094	18.892	2.34413
	107	0.81818	0.09598	0.599226	0.0350705	21.6216	1.04251	17.2601	2.02476
	108	1.00623	0.12221	0.601189	0.0546805	20.6697	1.28598	13.3921	1.62652
	109	0.69381	0.07603	0.595625	0.0405678	20.4834	0.738443	13.8541	1.51818
	110	0.91033	0.12337	0.630656	0.0367341	22.5581	3.83177	14.5134	1.96689
	111	0.56458	0.09452	0.731524	0.0481132	15.0015	0.990198	11.7975	1.9751
	112
	113
	114
	115
	116
	117
	118
	119
	120
	121	0.15095	0.02621	1.41749	0.0323697	4.27405	0.113259	2.5117	0.436116
