# Supplementary material for: PH domain-mediated autoinhibition and oncogenic activation of Akt
Source: eLife journal article supplement (doi:10.7554/elife.80148), 2022-08-15
Supplement: supp [file Figure_4-source_data_1_Kinase_activity_assay_Akt_mutants-pT308-Non-phospho-C-tail_kcat_Km.xlsx]

## Sheet: Sheet1
Kinase Assay with FL-WT-pT308-NonP(210310) FL-Akt(Y18A)-pT308-NonP(210316)
								[GSK3]=20uM
Akt	Vial number	Conc. of ATP(uM)	Conc. of Akt(nM)	Counts (cpm)	Avg		% of ATP	Consumed ATP	Rate (uM/min)	Conc.(uM)	V/E (/min)	% of GSK3
WT	1	2500	50	448	448	334	0.00116943	2.92359	0.292359	0.05	5.84717	0.146179
WT	2	2500	50	398	398	284	0.000994369	2.48592	0.248592	0.05	4.97185	0.124296
WT	3	1000	50	549	549	435	0.00152307	1.52307	0.152307	0.05	3.04613	0.0761533
WT	4	1000	50	522	522	408	0.00142853	1.42853	0.142853	0.05	2.85706	0.0714265
WT	5	250	50	897	897	783	0.00274152	0.685379	0.0685379	0.05	1.37076	0.034269
WT	6	250	50	892	892	778	0.00272401	0.681003	0.0681003	0.05	1.36201	0.0340501
WT	7	62.5	50	1332	1332	1218	0.00426458	0.266536	0.0266536	0.05	0.533073	0.0133268
WT	8	62.5	50	1181	1181	1067	0.00373589	0.233493	0.0233493	0.05	0.466986	0.0116746
WT	9	15.625	50	1946	1946	1832	0.00641438	0.100225	0.0100225	0.05	0.200449	0.00501123
WT	10	15.625	50	1731	1731	1617	0.0056616	0.0884625	0.00884625	0.05	0.176925	0.00442313
Y18A	11	2500	5	321	321	207	0.000724769	1.81192	0.181192	0.005	36.2384	0.0905961
Y18A	12	2500	5	313	313	199	0.000696759	1.7419	0.17419	0.005	34.8379	0.0870948
Y18A	13	1000	5	520	520	406	0.00142153	1.42153	0.142153	0.005	28.4306	0.0710764
Y18A	14	1000	5	511	511	397	0.00139002	1.39002	0.139002	0.005	27.8003	0.0695008
Y18A	15	250	5	907	907	793	0.00277653	0.694133	0.0694133	0.005	13.8827	0.0347066
Y18A	16	250	5	924	924	810	0.00283605	0.709013	0.0709013	0.005	14.1803	0.0354507
Y18A	17	62.5	5	1451	1451	1337	0.00468124	0.292577	0.0292577	0.005	5.85155	0.0146289
Y18A	18	62.5	5	1408	1408	1294	0.00453068	0.283168	0.0283168	0.005	5.66335	0.0141584
Y18A	19	15.625	5	1843	1843	1729	0.00605375	0.0945898	0.00945898	0.005	1.8918	0.00472949
Y18A	20	15.625	5	1870	1870	1756	0.00614828	0.0960669	0.00960669	0.005	1.92134	0.00480335
No Sub (WT)	21	2500	50	116	114
No Sub (WT)	21	2500	50	127
No Sub (Y18A)	22	2500	5	107
No Sub (Y18A)	24	2500	5	106
	25		Reference (5 ul)	31774
	26		Reference (5 ul)	32472
	27		Reference (5 ul)	31558
	28		Reference (5 ul)	31133
			Average Ref.	31734.2
			Reference (45 ul)	285608

## Sheet: Sheet2
Kinase Assay with FL-Akt(R86A)-pT308-NonP (210224) FL-Akt(E17K)-pT308-NonP (210316)
								[GSK3]=20uM							WT	Y18A	R86A	E17K
Akt	Vial number	Conc. of ATP(uM)	Conc. of Akt(nM)	Counts (cpm)	Avg		% of ATP	Consumed ATP	Rate (uM/min)	Conc.(uM)	V/E (/min)	% of GSK3		Michaelis-Menten
R86A	1	2500	200	559	559	378.667	0.00111835	2.79588	0.279588	0.2	1.39794	0.139794		Best-fit values
R86A	2	2500	200	601	601	420.667	0.00124239	3.10599	0.310599	0.2	1.55299	0.155299		Vmax	9.579	42.12	1.925	10.24
R86A	3	1000	200	878	878	697.667	0.00206048	2.06048	0.206048	0.2	1.03024	0.103024		Km	1991	482.3	792.1	826.1
R86A	4	1000	200	903	903	722.667	0.00213432	2.13432	0.213432	0.2	1.06716	0.106716		Std. Error
R86A	5	250	200	1389	1389	1208.67	0.00356967	0.892417	0.0892417	0.2	0.446209	0.0446209		Vmax	1.545	0.8908	0.09919	0.7307
R86A	6	250	200	1449	1449	1268.67	0.00374687	0.936718	0.0936718	0.2	0.468359	0.0468359		Km	608.5	32.32	109.4	155.6
R86A	7	62.5	200	2520	2520	2339.67	0.00690996	0.431872	0.0431872	0.2	0.215936	0.0215936		95% Confidence Intervals
R86A	8	62.5	200	2208	2208	2027.67	0.0059885	0.374281	0.0374281	0.2	0.187141	0.0187141		Vmax	6.016 to 13.14	40.06 to 44.17	1.696 to 2.154	8.553 to 11.92
R86A	9	15.625	200	2834	2834	2653.67	0.00783732	0.122458	0.0122458	0.2	0.0612291	0.00612291		Km	588.2 to 3395	407.8 to 556.9	539.8 to 1044	467.2 to 1185
R86A	10	15.625	200	3033	3033	2852.67	0.00842505	0.131641	0.0131641	0.2	0.0658207	0.00658207		Goodness of Fit
E17K	11	2500	25	435	435	254.667	0.000752131	1.88033	0.188033	0.025	7.52131	0.0940164		Degrees of Freedom	8	8	8	8
E17K	12	2500	25	454	454	273.667	0.000808245	2.02061	0.202061	0.025	8.08245	0.101031		R square	0.9777	0.9975	0.9917	0.9848
E17K	13	1000	25	588	588	407.667	0.001204	1.204	0.1204	0.025	4.816	0.0602		Absolute Sum of Squares	0.8317	4.166	0.02385	1.202
E17K	14	1000	25	685	685	504.667	0.00149048	1.49048	0.149048	0.025	5.96192	0.074524		Sy.x	0.3224	0.7216	0.0546	0.3876
E17K	15	250	25	1039	1039	858.667	0.00253598	0.633995	0.0633995	0.025	2.53598	0.0316998		Constraints
E17K	16	250	25	974	974	793.667	0.00234401	0.586003	0.0586003	0.025	2.34401	0.0293001		Km	Km > 0.0	Km > 0.0	Km > 0.0	Km > 0.0
E17K	17	62.5	25	1649	1649	1468.67	0.00433755	0.271097	0.0271097	0.025	1.08439	0.0135548		Number of points
E17K	18	62.5	25	1496	1496	1315.67	0.00388568	0.242855	0.0242855	0.025	0.97142	0.0121428		Analyzed	10	10	10	10
E17K	19	15.625	25	2087	2087	1906.67	0.00563114	0.0879865	0.00879865	0.025	0.351946	0.00439933
E17K	20	15.625	25	2022	2022	1841.67	0.00543917	0.084987	0.0084987	0.025	0.339948	0.00424935		kcat/Km	0.00481115	0.0873315	0.00243025	0.0123956
No Sub	21	2500		173	180.333
No Sub	21	2500
No Sub	22	2500		168
No Sub	24	2500		200
	25		Reference (5 ul)	37739
	26		Reference (5 ul)	37839
	27		Reference (5 ul)	37249
	28		Reference (5 ul)	37659
			Average Ref.	37621.5
			Reference (45 ul)	338594
