# Supplementary material for: PH domain-mediated autoinhibition and oncogenic activation of Akt
Source: eLife journal article supplement (doi:10.7554/elife.80148), 2022-08-15
Supplement: supp [file Figure_4-source_data_2_Kinase_activity_assay_Akt_mutants-pT308-pS473_kcat_Km.xlsx]

## Sheet: Sheet1
Kinase Assay with FL-Akt(R86A)-pT308-pS473 (210224) FL-Akt(WT)-pT308-pS473 (210310)
								[GSK3]=20uM
Akt	Vial number	Conc. of ATP(uM)	Conc. of Akt(nM)	Counts (cpm)	Avg		% of ATP	Consumed ATP	Rate (uM/min)	Conc.(uM)	V/E (/min)	% of GSK3
WT	1	2500	10	363	363	241	0.00083197	2.07992	0.207992	0.01	20.7992	0.103996
WT	2	2500	10	328	328	206	0.000711144	1.77786	0.177786	0.01	17.7786	0.088893
WT	3	1000	10	570	570	448	0.00154657	1.54657	0.154657	0.01	15.4657	0.0773283
WT	4	1000	10	619	619	497	0.00171572	1.71572	0.171572	0.01	17.1572	0.0857861
WT	5	250	10	1265	1265	1143	0.00394581	0.986454	0.0986454	0.01	9.86454	0.0493227
WT	6	250	10	1097	1097	975	0.00336585	0.841463	0.0841463	0.01	8.41463	0.0420732
WT	7	62.5	10	2127	2127	2005	0.00692157	0.432598	0.0432598	0.01	4.32598	0.0216299
WT	8	62.5	10	2103	2103	1981	0.00683872	0.42742	0.042742	0.01	4.2742	0.021371
WT	9	15.625	10	2824	2824	2702	0.00932773	0.145746	0.0145746	0.01	1.45746	0.00728729
WT	10	15.625	10	2711	2711	2589	0.00893763	0.139651	0.0139651	0.01	1.39651	0.00698253
R86A	11	2500	30	402	402	280	0.000966604	2.41651	0.241651	0.03	8.05503	0.120825
R86A	12	2500	30	433	433	311	0.00107362	2.68405	0.268405	0.03	8.94684	0.134203
R86A	13	1000	30	732	732	610	0.00210582	2.10582	0.210582	0.03	7.01939	0.105291
R86A	14	1000	30	738	738	616	0.00212653	2.12653	0.212653	0.03	7.08843	0.106326
R86A	15	250	30	1369	1369	1247	0.00430484	1.07621	0.107621	0.03	3.58737	0.0538105
R86A	16	250	30	1309	1309	1187	0.00409771	1.02443	0.102443	0.03	3.41476	0.0512214
R86A	17	62.5	30	2275	2275	2153	0.00743249	0.464531	0.0464531	0.03	1.54844	0.0232265
R86A	18	62.5	30	2302	2302	2180	0.0075257	0.470356	0.0470356	0.03	1.56785	0.0235178
R86A	19	15.625	30	3224	3224	3102	0.0107086	0.167322	0.0167322	0.03	0.557739	0.00836609
R86A	20	15.625	30	3108	3108	2986	0.0103081	0.161065	0.0161065	0.03	0.536882	0.00805323
No Sub	21	2500		130	122
No Sub	21	2500		117
No Sub	22	2500		112
No Sub	24	2500		129
	25		Reference (5 ul)	32848
	26		Reference (5 ul)	31551
	27		Reference (5 ul)	31830
	28		Reference (5 ul)	32515
			Average Ref.	32186
			Reference (45 ul)	289674

## Sheet: Sheet2
Kinase Assay with FL-Akt(E17K)-pT308-pS473 (210316) FL-Akt(Y18A)-pT308-pS473 (210316)
								[GSK3]=20uM							WT	R86A	E17K	Y18A
Akt	Vial number	Conc. of ATP(uM)	Conc. of Akt(nM)	Counts (cpm)	Avg		% of ATP	Consumed ATP	Rate (uM/min)	Conc.(uM)	V/E (/min)	% of GSK3		Michaelis-Menten
E17K	1	2500	10	315	315	151	0.000491844	1.22961	0.122961	0.0075	16.3948	0.0614805		Best-fit values
E17K	2	2500	10	320	320	156	0.00050813	1.27033	0.127033	0.0075	16.9377	0.0635163		Vmax	21.5	9.936	17.94	75.58
E17K	3	1000	10	557	557	393	0.0012801	1.2801	0.12801	0.0075	17.068	0.0640048		Km	310.1	420	146.5	66.5
E17K	4	1000	10	515	515	351	0.00114329	1.14329	0.114329	0.0075	15.2439	0.0571646		Std. Error
E17K	5	250	10	1074	1074	910	0.00296409	0.741023	0.0741023	0.0075	9.88031	0.0370512		Vmax	0.992	0.3396	0.5561	1.411
E17K	6	250	10	1271	1271	1107	0.00360577	0.901442	0.0901442	0.0075	12.0192	0.0450721		Km	51.26	47.39	19.14	5.969
E17K	7	62.5	10	2245	2245	2081	0.00677832	0.423645	0.0423645	0.0075	5.6486	0.0211823		95% Confidence Intervals
E17K	8	62.5	10	2127	2127	1963	0.00639397	0.399623	0.0399623	0.0075	5.32831	0.0199812		Vmax	19.21 to 23.79	9.153 to 10.72	16.66 to 19.23	72.32 to 78.83
E17K	9	15.625	10	2973	2973	2809	0.0091496	0.142962	0.0142962	0.0075	1.90617	0.00714812		Km	191.9 to 428.3	310.7 to 529.3	102.4 to 190.6	52.73 to 80.26
E17K	10	15.625	10	3044	3044	2880	0.00938086	0.146576	0.0146576	0.0075	1.95435	0.0073288		Goodness of Fit
Y18A	11	2500	30	356	356	192	0.000625391	1.56348	0.156348	0.002	78.1739	0.0781739		Degrees of Freedom	8	8	8	8
Y18A	12	2500	30	339	339	175	0.000570018	1.42504	0.142504	0.002	71.2522	0.0712522		R square	0.9814	0.9924	0.9848	0.9899
Y18A	13	1000	30	572	572	408	0.00132896	1.32896	0.132896	0.002	66.4478	0.0664478		Absolute Sum of Squares	8.812	0.7269	5.198	51.47
Y18A	14	1000	30	610	610	446	0.00145273	1.45273	0.145273	0.002	72.6365	0.0726365		Sy.x	1.05	0.3014	0.8061	2.537
Y18A	15	250	30	1619	1619	1455	0.00473929	1.18482	0.118482	0.002	59.2411	0.0592411		Constraints
Y18A	16	250	30	1653	1653	1489	0.00485004	1.21251	0.121251	0.002	60.6255	0.0606255		Km	Km > 0.0	Km > 0.0	Km > 0.0	Km > 0.0
Y18A	17	62.5	30	3677	3677	3513	0.0114427	0.715169	0.0715169	0.002	35.7584	0.0357584		Number of points
Y18A	18	62.5	30	3817	3817	3653	0.0118987	0.74367	0.074367	0.002	37.1835	0.0371835		Analyzed	10	10	10	10
Y18A	19	15.625	30	5824	5824	5660	0.018436	0.288063	0.0288063	0.002	14.4031	0.0144031
Y18A	20	15.625	30	6046	6046	5882	0.0191591	0.299361	0.0299361	0.002	14.9681	0.0149681
No Sub	21	2500		116	164
No Sub	21	2500		231
No Sub	22	2500		176
No Sub	24	2500		133
	25		Reference (5 ul)	34309
	26		Reference (5 ul)	34251
	27		Reference (5 ul)	33943
	28		Reference (5 ul)	33945
			Average Ref.	34112
			Reference (45 ul)	307008
