# Supplementary material for: PH domain-mediated autoinhibition and oncogenic activation of Akt
Source: eLife journal article supplement (doi:10.7554/elife.80148), 2022-08-15
Supplement: supp [file Figure_5-figure_supplement_1-source_data_1_Fluorescence_Anisotropy_binding_experiments_PIP2.xlsx]

## Sheet: E17K
E17K	Fluorescence Anisotropy
[PH] (μM)	Run1	Run2	Run3	Run4
0.1	0.0102	0.0138	0.014667	0.014667
0.2	0.0162	0.018	0.020333	0.020667
0.5	0.0298	0.032	0.035	0.036333
1	0.0542	0.0508	0.055667	0.053333
2	0.0714	0.0702	0.087333	0.087333
5	0.1058	0.1046	0.109	0.112
10	0.1566	0.1564	0.141667	0.144667
20	0.1938	0.1906	0.172333	0.172333
30	0.1996	0.201	0.189	0.190333
50	0.2154	0.2164	0.201	0.207667

## Sheet: WT
WT	Fluorescence Anisotropy
[PH] (μM)	Run1	Run2	Run3
0.1	0.001333	0.003	0.005
0.2	0.001333	0.005667	0.006667
0.5	0.005333	0.008333	0.008667
1	0.011333	0.009667	0.011667
2	0.014333	0.011	0.017333
5	0.041333	0.041333	0.041667
10	0.078667	0.077667	0.080333
20	0.133333	0.133333	0.135
30	0.168333	0.168333	0.167333
50	0.202	0.201
