# Supplementary material for: PH domain-mediated autoinhibition and oncogenic activation of Akt
Source: eLife journal article supplement (doi:10.7554/elife.80148), 2022-08-15
Supplement: supp [file Figure_5-figure_supplement_1-source_data_2_Dephosphorylation_by_Alkaline_PPase_(pS473_WT_R86A_E17K_Y18A)_Quantification.xlsx]

## Sheet: Sheet 1
Name	Volume	Centre X	Centre Y	Area	Akt	Time (min)	Subtracted	Normalized
1	68710799	287	396	1984	WT pS473	0	68095693	1
2	54371332	351	397	1680		5	53957278	0.792374
3	43301262	411	398	1512		10	43031302	0.631924
4	25191366	471	398	1188		20	25065772	0.368096
5	13130966	531	398	1188		40	13038836	0.191478
6	9237771	594	398	1160		80	9154893	0.134442
7	72476590	709	397	1980	R86A pS473	0	71853937	1
8	52402378	774	397	1508		5	52077678	0.724771
9	44340762	833	395	1296		10	44133691	0.614214
10	31380531	894	396	1296		20	31234180	0.43469
11	17844977	953	396	1144		40	17757663	0.247136
12	14708588	1017	397	1232		80	14633578	0.203657
13	75960425	308	772	2048	E17K pS473	0	73790404	1
14	65783552	372	773	1740		5	64670532	0.876408
15	55724029	433	773	1568		10	55133964	0.74717
16	35740088	493	772	1344		20	35421596	0.48003
17	18990300	554	771	1120		40	18826494	0.255135
18	12039526	616	771	1200		80	11767501	0.159472
19	73066538	736	769	1848	Y18A pS473	0	72203568	1
20	62008662	799	768	1560		5	61581787	0.852891
21	56127804	860	768	1680		10	55759001	0.772247
22	34110221	920	768	1392		20	33900589	0.469514
23	20213897	981	768	1276		40	20082051	0.278131
24	7992546	1044	768	1200		80	7897790	0.109382
Copy of 1	615106	287	354	1984
Copy of 2	414054	351	355	1680
Copy of 3	269960	411	356	1512
Copy of 4	125594	471	356	1188
Copy of 5	92130	531	356	1188
Copy of 6	82878	594	356	1160
Copy of 7	622653	709	355	1980
Copy of 8	324700	774	355	1508
Copy of 9	207071	833	353	1296
Copy of 10	146351	894	354	1296
Copy of 11	87314	953	354	1144
Copy of 12	75010	1017	355	1232
Copy of 13	2170021	308	730	2048
Copy of 14	1113020	372	731	1740
Copy of 15	590065	433	731	1568
Copy of 16	318492	493	730	1344
Copy of 17	163806	554	729	1120
Copy of 18	272025	616	729	1200
Copy of 19	862970	736	727	1848
Copy of 20	426875	799	726	1560
Copy of 21	368803	860	726	1680
Copy of 22	209632	920	726	1392
Copy of 23	131846	981	726	1276
Copy of 24	94756	1044	726	1200
