# Supplementary material for: PH domain-mediated autoinhibition and oncogenic activation of Akt
Source: eLife journal article supplement (doi:10.7554/elife.80148), 2022-08-15
Supplement: supp [file Figure_5-source_data_1_Fluorescence_Anisotropy_binding_experiments_PIP3.xlsx]

## Sheet: E17K
E17K	Fluorescence Anisotropy
[PH] (μM)	Run1	Run2	Run3
0	0.0077	0.0083	0.006
0.01	0.0157	0.0163	0.0104
0.02	0.023	0.0217	0.014
0.05	0.038	0.0397	0.028
0.1	0.06	0.061	0.0572
0.2	0.0793	0.0763	0.0812
0.5	0.1153	0.1077	0.1022
1	0.1347	0.1297	0.1272
2	0.1507	0.148	0.1398
3	0.161	0.161	0.149

## Sheet: WT
WT	Fluorescence Anisotropy
[PH] (μM)	Run1	Run2	Run3
0	0.0063	0.008	0.0093
0.01	0.0103	0.0103
0.02	0.0137	0.0087
0.05	0.0223	0.0243
0.1	0.0427	0.0323	0.0343
0.2	0.057	0.0517	0.0543
0.5	0.0817	0.075	0.07
1	0.093	0.0953	0.0877
2	0.1167	0.105	0.0987
3	0.1117	0.1127	0.103

## Sheet: R86A
R86A	Fluorescence Anisotropy
[PH] (μM)	Run1	Run2	Run3
0	0.0077	0.008	0.008
1	0.0133	0.012	0.014667
2	0.0207	0.0213	0.018333
3	0.025	0.0233	0.024
5	0.0313	0.0387	0.031333
10	0.0413	0.038	0.045333
20	0.0603	0.0673	0.065
50	0.108	0.108

## Sheet: Y18A
Y18A	Fluorescence Anisotropy
[PH] (μM)	Run1	Run2	Run3
0	0.0067	0.0048	0.0076
0.1	0.014	0.0122	0.0164
0.5	0.0257	0.0368	0.0394
1	0.0443	0.064	0.066
2	0.0793	0.0942	0.0988
3	0.0997	0.1178	0.1234
5	0.1753	0.156	0.1538
10	0.2323	0.2104	0.2122
20	0.2402	0.239	0.2382
50	0.2692	0.2666	0.2682

## Sheet: E17K Y18A
E17K/Y18A	Fluorescence Anisotropy
[PH] (μM)	Run1	Run2	Run3
0	0.005	0.00675	0.007
0.01	0.0095	0.01125	0.0105
0.02	0.01375	0.01625	0.01425
0.05	0.022	0.0235	0.0245
0.1	0.03875	0.0395	0.041
0.2	0.05975	0.06475	0.06325
0.5	0.09125	0.09175	0.08775
1	0.112	0.111	0.11225
2	0.1325	0.12725	0.12675
3	0.13375	0.13775	0.13575
