# Supplementary material for: PH domain-mediated autoinhibition and oncogenic activation of Akt
Source: eLife journal article supplement (doi:10.7554/elife.80148), 2022-08-15
Supplement: supp [file Figure_5-source_data_Dephosphorylation_by_PP2A_(pT308_E17K)_Quantification.xlsx]

## Sheet: Run1
Name	Volume	Centre X	Centre Y	Area	min	Subtracted	Normalized
1	48098905	475	455	1104	0	47472887	1
2	39244242	520	454	924	10	38808634	0.81749
3	27467399	560	454	684	20	27236928	0.573736
4	19878321	600	454	640	30	19724643	0.415493
5	5710073	640	453	560	60	5599973	0.117962
6	1472591	682	453	480	90	1388995	0.0292587
Copy of 1	626018	475	423	1104
Copy of 2	435608	520	422	924
Copy of 3	230471	560	422	684
Copy of 4	153678	600	422	640
Copy of 5	110100	640	421	560
Copy of 6	83596	682	421	480

## Sheet: Run2
Name	Volume	Centre X	Centre Y	Area	min	Subtracted	Normalized
1	74455188	354	878	2048	0	71530766	1
2	73205051	417	877	1972	10	70039300	0.979149
3	66204637	479	879	1920	20	62945031	0.879971
4	54447879	540	880	1792	30	51524879	0.720318
5	31351286	602	883	1680	60	29450838	0.411723
6	18249812	667	888	1624	90	16877551	0.235948
Copy of 1	2924422	355	924	2048
Copy of 2	3165751	418	923	1972
Copy of 3	3259606	480	925	1920
Copy of 4	2923000	541	926	1792
Copy of 5	1900448	603	929	1680
Copy of 6	1372261	668	934	1624

## Sheet: Run3
Name	Volume	Centre X	Centre Y	Area	min	Subtracted	Normalized
7	86241320	725	859	2232	0	85394549	1
8	78097123	788	861	2108	10	77304482	0.905262
9	71833160	850	863	2040	20	71091725	0.832509
10	67375755	912	864	1740	30	66839983	0.78272
11	28684320	971	866	1352	60	28411530	0.332709
12	15042355	1033	867	1144	90	14870750	0.174142
Copy of 7	846771	726	904	2232
Copy of 8	792641	789	906	2108
Copy of 9	741435	851	908	2040
Copy of 10	535772	913	909	1740
Copy of 11	272790	972	911	1352
Copy of 12	171605	1034	912	1144

## Sheet: Run4
Name	Volume	Centre X	Centre Y	Area	min	Subtracted	Normalized
7	54315252	661	875	2088	0	53431113	1
8	45253200	719	877	1728	10	44571853	0.834193
9	42269026	776	879	1728	20	41648495	0.77948
10	32365481	832	879	1400	30	31967806	0.598299
11	10633773	889	876	1200	60	10422485	0.195064
12	6101966	945	874	960	90	5980930	0.111937
Copy of 7	884139	663	918	2088
Copy of 8	681347	721	920	1728
Copy of 9	620531	778	922	1728
Copy of 10	397675	834	922	1400
Copy of 11	211288	891	919	1200
Copy of 12	121036	947	917	960

## Sheet: Run5
Name	Volume	Centre X	Centre Y	Area	min	Subtracted	Normalized
1	58793279	663	839	2016	0	56265771	1
2	50270763	720	841	1600	10	48200874	0.856664
3	46806306	776	844	1500	20	44872300	0.797506
4	38765359	830	845	1288	30	37176895	0.660737
5	23528594	886	844	1248	60	22089421	0.392591
6	17466742	943	845	1000	90	16368542	0.290915
Copy of 1	2527508	662	790	2016
Copy of 2	2069889	719	792	1600
Copy of 3	1934006	775	795	1500
Copy of 4	1588464	829	796	1288
Copy of 5	1439173	885	795	1248
Copy of 6	1098200	942	796	1000
