# Supplementary material for: PH domain-mediated autoinhibition and oncogenic activation of Akt
Source: eLife journal article supplement (doi:10.7554/elife.80148), 2022-08-15
Supplement: supp [file Figure_5-source_data_Dephosphorylation_by_PP2A_(pT308_R86A)_Quantification.xlsx]

## Sheet: Run1
	Name	Volume	Centre X	Centre Y	Area		min		Normalized
1	1	28017876	468	205	924		0	27737022	1
2	2	23951580	513	206	720		10	23691761	0.854157
3	3	18599210	556	208	576		20	18415804	0.663943
4	4	12492528	598	211	476		30	12421447	0.447829
5	5	4011059	638	213	340		60	3986895	0.143739
6	6	1964229	681	215	340		90	1951152	0.0703447
7	Copy of 1	280854	469	231	924
8	Copy of 2	259819	514	232	720
9	Copy of 3	183406	557	234	576
10	Copy of 4	71081	599	237	476
11	Copy of 5	24164	639	239	340
12	Copy of 6	13077	682	241	340

## Sheet: Run2
	Name	Volume	Centre X	Centre Y	Area		min		Normalized
1	1	25266081	176	415	1196		0	24836074	1
2	2	16058925	221	413	576		10	15886634	0.63966
3	3	12983981	263	413	504		20	12901034	0.519447
4	4	10058286	305	413	408		30	9997881	0.402555
5	5	10456759	346	414	380		60	10402174	0.418833
6	6	6002578	392	414	380		90	5942422	0.239266
7	Copy of 1	430007	177	447	1196
8	Copy of 2	172291	222	445	576
9	Copy of 3	82947	264	445	504
10	Copy of 4	60405	306	445	408
11	Copy of 5	54585	347	446	380
12	Copy of 6	60156	393	446	380

## Sheet: Run3
	Name	Volume	Centre X	Centre Y	Area	min		Normalized
1	1	36354092	513	469	1104	0	35859459	1
2	2	23320325	557	469	760	10	23116820	0.644651
3	3	17204557	598	470	800	20	17033451	0.475006
4	4	8257461	639	473	684	30	8114974	0.226299
5	5	3332012	681	473	560	60	3251219	0.0906656
6	6	750696	723	475	560	90	682643	0.0190366
7	Copy of 1	494633	514	434	1104
8	Copy of 2	203505	558	434	760
9	Copy of 3	171106	599	435	800
10	Copy of 4	142487	640	438	684
11	Copy of 5	80793	682	438	560
12	Copy of 6	68053	724	440	560
