# Supplementary material for: PH domain-mediated autoinhibition and oncogenic activation of Akt
Source: eLife journal article supplement (doi:10.7554/elife.80148), 2022-08-15
Supplement: supp [file Figure_5-source_data_Dephosphorylation_by_PP2A_(pT308_WT)_Quantification.xlsx]

## Sheet: Run1
	Name	Volume	Centre X	Centre Y	Area		Time		Normalized
1	3	30743873	294	359	720		0	30491826	1
2	4	24607090	336	359	608		10	24404761	0.800371
3	5	16741937	376	358	504		20	16605304	0.544582
4	6	5762099	416	357	432		30	5646767	0.18519
5	7	3089629	458	357	432		60	2932253	0.0961652
6	8	850398	500	357	360		90	705587	0.0231402
7	Copy of 8	144811	500	386	360
8	Copy of 7	157376	458	386	432
9	Copy of 6	115332	416	386	432
10	Copy of 5	136633	376	387	504
11	Copy of 4	202329	336	388	608
12	Copy of 3	252047	294	388	720

## Sheet: Run2
	Name	Volume	Centre X	Centre Y	Area	min		Normalized
1	1	44663487	193	537	968	0	41525218	1
2	2	31883146	236	535	720	10	29722522	0.71577
3	3	19339410	277	534	576	20	17492640	0.421253
4	4	13583800	318	533	560	30	11867679	0.285795
5	5	4195714	360	532	532	60	2664310	0.0641613
6	6	1984591	402	532	432	90	496482	0.0119562
7	Copy of 1	3138269	194	509	968
8	Copy of 2	2160624	237	507	720
9	Copy of 3	1846770	278	506	576
10	Copy of 4	1716121	319	505	560
11	Copy of 5	1531404	361	504	532
12	Copy of 6	1488109	403	504	432

## Sheet: Run3
	Name	Volume	Centre X	Centre Y	Area			min		Normalized
1	1	29611930	180	206	1056		WT	0	29426268	1
2	2	24438930	224	205	836			10	24281153	0.825152
3	3	18968690	266	204	684			20	18864987	0.641093
4	4	15341224	308	203	720			30	15239709	0.517895
5	5	7275059	349	204	684			60	7206336	0.244895
6	6	4101194	392	204	640			90	4045444	0.137477
13	Copy of 1	185662	180	241	1056
14	Copy of 2	157777	224	240	836
15	Copy of 3	103703	266	239	684
16	Copy of 4	101515	308	238	720
17	Copy of 5	68723	349	239	684
18	Copy of 6	55750	392	239	640

## Sheet: Run4
	Name	Volume	Centre X	Centre Y	Area			min		Normalized
1	1	62934588	285	852	1904		WT	0	62488083	1
2	2	52746765	347	854	1620			10	52373612	0.838138
3	3	44576960	409	855	1680			20	44221167	0.707674
4	4	30332365	472	856	1404			30	30089802	0.481529
5	5	4159960	535	856	1012			60	4017938	0.0642993
6	6	995749	600	857	1000			90	862794	0.0138073
13	Copy of 1	446505	286	897	1904
14	Copy of 2	373153	348	899	1620
15	Copy of 3	355793	410	900	1680
16	Copy of 4	242563	473	901	1404
17	Copy of 5	142022	536	901	1012
18	Copy of 6	132955	601	902	1000
