# Supplementary material for: PH domain-mediated autoinhibition and oncogenic activation of Akt
Source: eLife journal article supplement (doi:10.7554/elife.80148), 2022-08-15
Supplement: supp [file Figure_5-source_data_Dephosphorylation_by_PP2A_(pT308_Y18A)_Quantification.xlsx]

## Sheet: Run1
	Name	Volume	Centre X	Centre Y	Area		min		Normalized
1	3	40320945	574	356	968		0	35656979	1
2	4	34231463	617	356	800		10	30366121	0.851618
3	5	28846561	657	355	684		20	25584873	0.717528
4	6	19916149	697	354	532		30	17408188	0.488213
5	7	15041954	738	354	560		60	12409057	0.348012
6	8	3666526	779	354	456		90	1554028	0.0435827
7	Copy of 3	4663966	574	396	968
8	Copy of 4	3865342	617	396	800
9	Copy of 5	3261688	657	395	684
10	Copy of 6	2507961	697	394	532
11	Copy of 7	2632897	738	394	560
12	Copy of 8	2112498	779	394	456

## Sheet: Run2
	Name	Volume	Centre X	Centre Y	Area		min		Normalized
7	7	35036185	510	396	968		0	34767859	1
8	8	30717665	553	395	840		10	30485951	0.876843
9	9	25254926	594	395	800		20	25069159	0.721044
10	10	20493112	634	394	720		30	20360544	0.585614
11	11	12812328	674	392	608		60	12727714	0.366077
12	12	5692959	716	391	480		90	5641626	0.162266
19	Copy of 7	268326	511	363	968
20	Copy of 8	231714	554	362	840
21	Copy of 9	185767	595	362	800
22	Copy of 10	132568	635	361	720
23	Copy of 11	84614	675	359	608
24	Copy of 12	51333	717	358	480

## Sheet: Run3
	Name	Volume	Centre X	Centre Y	Area		min		Normalized
1	1	36431675	470	418	1056	Y18A-NonP	0	35607833	1
2	2	33881536	513	420	1008		10	33257359	0.93399
3	3	30347946	555	423	960		20	30028467	0.843311
4	4	25074774	595	426	836		30	24897054	0.699202
5	5	12836213	636	427	840		60	12707252	0.356867
6	6	7102193	680	432	720		90	7031575	0.197473
7	Copy of 1	823842	471	451	1056
8	Copy of 2	624177	514	453	1008
9	Copy of 3	319479	556	456	960
10	Copy of 4	177720	596	459	836
11	Copy of 5	128961	637	460	840
12	Copy of 6	70618	681	465	720
