# Supplementary material for: PH domain-mediated autoinhibition and oncogenic activation of Akt
Source: eLife journal article supplement (doi:10.7554/elife.80148), 2022-08-15
Supplement: supp [file Figure_6-source_data_Kinase_activity_assay_Akt(WT_or_F309L)-pT308_with_Non-phospho-C-tail.xlsx]

## Sheet: Sheet1
Kinase Assay with FL-Akt(WT, 1-480)-pT308-Non-P (210310) FL-Akt(F309L, 1-480)-pT308-Non-P (211014)							[ATP]=250uM	[GSK3]=20uM
Protein	Vial number	Conc. of Akt(nM)	Counts (cpm)	Avg		% of ATP	Consumed ATP	Rate (uM/min)	Conc.(uM)	V/E (/min)	% of GSK3
WT NonP	1	50	5355	5355	4723	0.00262421	0.656053	0.0656053	0.05	1.31211	0.0328026
	2	50	4974	4974	4342	0.00241252	0.603129	0.0603129	0.05	1.20626	0.0301565
F309L NonP	3	44.5833	7663	7663	7031	0.00390659	0.976647	0.0976647	0.0446	2.18979	0.0488324
	4	44.5833	8674	8674	8042	0.00446833	1.11708	0.111708	0.0446	2.50467	0.0558541
F309L NonP	5	8.91667	2093	2093	1461	0.000811766	0.202942	0.0202942	0.0089	2.28024	0.0101471
	6	8.91667	2135	2135	1503	0.000835102	0.208776	0.0208776	0.0089	2.34579	0.0104388
Ctrl	11	No-Enzyme	630	632
	12	No-Enzyme	634
	13	Reference (5 ul)	199339
	14	Reference (5 ul)	199597
	15	Reference (5 ul)	201252
	16	Reference (5 ul)	199714
		Average Ref.	199976
		Reference (45 ul)	1.79978e+06
