# Supplementary material for: PH domain-mediated autoinhibition and oncogenic activation of Akt
Source: eLife journal article supplement (doi:10.7554/elife.80148), 2022-08-15
Supplement: supp [file Figure_6-source_data_Kinase_activity_assay_deltaPH-(WT_or_F309L)-Akt-pT308_with_Non-phospho-C-tail.xlsx]

## Sheet: Sheet1
Kinase Assay with deltaPH-Akt(WT, S122C-480)-pT308-Non-P (211104) deltaPH-Akt(F309L, S122C-480)-pT308-Non-P (211104)							[ATP]=250uM	[GSK3]=20uM
Protein	Vial number	Conc. of Akt(nM)	Counts (cpm)	Avg		% of ATP	Consumed ATP	Rate (uM/min)	Conc.(uM)	V/E (/min)	% of GSK3
ΔPH-Akt(WT) NonP	1	10.29	7707	7707	7174	0.00656266	1.64067	0.164067	0.01029	15.9443	0.0820333
	2	10.29	10630	10630	10097	0.00923658	2.30915	0.230915	0.01029	22.4407	0.115457
ΔPH-Akt(WT) NonP	3	2.058	2123	2123	1590	0.00145451	0.363627	0.0363627	0.002058	17.6689	0.0181813
	4	2.058	2284	2284	1751	0.00160179	0.400447	0.0400447	0.002058	19.4581	0.0200223
ΔPH-Akt(F309L) NonP	5	27.55	13764	13764	13231	0.0121035	3.02588	0.302588	0.02755	10.9832	0.151294
	6	27.55	13435	13435	12902	0.0118026	2.95064	0.295064	0.02755	10.7101	0.147532
ΔPH-Akt(F309L) NonP	7	5.51	3806	3806	3273	0.00299409	0.748523	0.0748523	0.00551	13.5848	0.0374261
	8	5.51	3949	3949	3416	0.0031249	0.781226	0.0781226	0.00551	14.1783	0.0390613
Ctrl	9	No-Enzyme	646	533
	10	No-Enzyme	420
	11	Reference (5 ul)	121562
	12	Reference (5 ul)	121434
	13	Reference (5 ul)	122444
	14	Reference (5 ul)	120406
		Average Ref.	121462
		Reference (45 ul)	1.09315e+06
